# Supplementary material
Source: PubMed Central journal article supplement (PMC164646)
Supplement: pnas_1330369100_1.pdf [file pnas_1330369100_1.pdf]

**Table 1. Gene counts per human block**

- Human chromosomes are numbered 1-22 and X.
- Mouse chromosomes are numbered 1-19 and X.
- Synteny blocks are numbered 1-281 and are correlated between human and mouse. These blocks are from Pevzner, P.A. & Tesler, G. (2003) *Genome Research* **13**, 13-26.
- Null blocks 282-304 are placed at the start of each chromosome and are uncorrelated.
- Genes are from an Ensembl database.
- ngenes/block is the number of genes hitting the block, whether fully contained in the block or only partially contained in the block.
- pgenes/block is the number of genes only partially in the block; these are also counted within ngenes/block.
- ngenes/gap, pgenes/gap are similar and refer to the gap following the block in the specified organism.
- A gene overlapping block-gap would be counted in all four of these categories for the one block; a gene overlapping gap-block would be counted in the two gap fields of the prior block and the two block fields of the current block.
- Blank counts are 0.
- Genes in more complicated situations (gene covering block-gap-block, etc.) are listed at the end by their Ensembl IDs.

| Block no. | Human |      |           |           | Mouse |      |           |           | Human        |              |            |            |
|-----------|-------|------|-----------|-----------|-------|------|-----------|-----------|--------------|--------------|------------|------------|
|           | Chrom | Sign | Start     | End       | Chrom | Sign | Start     | End       | ngenes/block | pgenes/block | ngenes/gap | pgenes/gap |
| 282       | 1     |      | 0         | 0         | 1     | 1    | 0         | 0         | 0            | 0            | 11         | 0          |
| 1         | 1     | 1    | 388622    | 26210863  | 4     | -1   | 131596899 | 151729485 | 387          | 0            | 0          | 0          |
| 2         | 1     | 1    | 26725571  | 28792941  | 4     | 1    | 129974347 | 131591410 | 49           | 0            | 1          | 1          |
| 3         | 1     | 1    | 28828047  | 58928651  | 4     | -1   | 101021001 | 129928743 | 374          | 2            | 3          | 2          |
| 4         | 1     | 1    | 59042296  | 67572651  | 4     | 1    | 92684571  | 101020121 | 43           | 1            | 6          | 0          |
| 5         | 1     | 1    | 68550771  | 89930562  | 3     | -1   | 143216407 | 160561668 | 97           | 1            | 10         | 1          |
| 6         | 1     | 1    | 90380403  | 94230252  | 5     | 1    | 103025217 | 105957701 | 26           | 1            | 1          | 1          |
| 7         | 1     | 1    | 94317982  | 155859818 | 3     | -1   | 87896509  | 122986444 | 584          | 0            | 8          | 0          |
| 8         | 1     | 1    | 156310730 | 206132769 | 1     | -1   | 131319427 | 175759600 | 430          | 0            | 1          | 0          |
| 9         | 1     | 1    | 206236161 | 222832721 | 1     | -1   | 183709942 | 196753186 | 100          | 0            | 2          | 1          |
| 10        | 1     | 1    | 222898263 | 224442753 | 1     | 1    | 182482707 | 183514231 | 14           | 1            | 1          | 0          |
| 11        | 1     | 1    | 224492388 | 226088674 | 1     | -1   | 181294881 | 182396046 | 22           | 0            | 30         | 0          |
| 12        | 1     | 1    | 227339192 | 233450982 | 8     | 1    | 123638191 | 126981808 | 45           | 1            | 1          | 1          |
| 13        | 1     | 1    | 233456326 | 238143978 | 13    | -1   | 9819471   | 13620102  | 27           | 1            | 1          | 0          |
| 14        | 1     | 1    | 238300847 | 244964237 | 1     | 1    | 175801414 | 181179269 | 33           | 0            | 31         | 0          |
| 283       | 2     | 1    | 0         | 0         | 2     | 1    | 0         | 0         |              |              |            |            |
| 15        | 2     | 1    | 167711    | 1513140   | 12    | -1   | 24172170  | 25101197  | 10           | 1            | 1          | 1          |
| 16        | 2     | 1    | 1611589   | 3005199   | 12    | 1    | 23073963  | 24111277  | 4            | 0            | 1          | 1          |
| 17        | 2     | 1    | 3071079   | 26213027  | 12    | -1   | 3151971   | 23012794  | 113          | 2            | 2          | 1          |

|     |   |   |           |           |    |    |           |           |     |   |    |   |
|-----|---|---|-----------|-----------|----|----|-----------|-----------|-----|---|----|---|
| 18  | 2 | 1 | 26317413  | 28924420  | 5  | 1  | 28612308  | 31149741  | 55  | 1 | 1  | 1 |
| 19  | 2 | 1 | 28958276  | 53319010  | 17 | 1  | 70695360  | 92553193  | 124 | 0 | 0  | 0 |
| 20  | 2 | 1 | 53925983  | 68756708  | 11 | -1 | 16956548  | 31075125  | 78  | 1 | 1  | 1 |
| 21  | 2 | 1 | 68773559  | 71027213  | 6  | -1 | 86869888  | 88518715  | 26  | 1 | 2  | 1 |
| 22  | 2 | 1 | 71041948  | 74016566  | 6  | 1  | 84526318  | 86814395  | 32  | 1 | 7  | 2 |
| 23  | 2 | 1 | 74194189  | 86916548  | 6  | -1 | 72244385  | 84461154  | 87  | 1 | 68 | 0 |
| 24  | 2 | 1 | 93583329  | 94910635  | 2  | -1 | 128084707 | 128642762 | 35  | 1 | 2  | 2 |
| 25  | 2 | 1 | 95035530  | 104853801 | 1  | 1  | 36764741  | 44416656  | 87  | 1 | 3  | 0 |
| 26  | 2 | 1 | 105281222 | 106854141 | 17 | -1 | 53032235  | 54625973  | 9   | 0 | 2  | 1 |
| 27  | 2 | 1 | 106989746 | 107997641 | 10 | 1  | 58237574  | 59163852  | 9   | 2 | 7  | 2 |
| 28  | 2 | 1 | 108535418 | 110853774 | 2  | 1  | 128709883 | 130400240 | 23  | 1 | 23 | 0 |
| 29  | 2 | 1 | 111642184 | 119781632 | 1  | -1 | 118964536 | 126417148 | 31  | 0 | 0  | 0 |
| 30  | 2 | 1 | 119901307 | 123756589 | 1  | 1  | 113697788 | 118004675 | 1   | 0 | 1  | 0 |
| 31  | 2 | 1 | 124480451 | 126084332 | 18 | -1 | 31809356  | 32842104  | 21  | 0 | 0  | 0 |
| 32  | 2 | 1 | 126115068 | 129578945 | 1  | -1 | 34894094  | 36742630  | 30  | 1 | 21 | 1 |
| 33  | 2 | 1 | 130735258 | 136256885 | 1  | 1  | 126437826 | 131188284 | 23  | 0 | 3  | 0 |
| 34  | 2 | 1 | 137622136 | 147417510 | 2  | 1  | 39874855  | 50169102  | 16  | 0 | 0  | 0 |
| 35  | 2 | 1 | 147472263 | 148797697 | 2  | -1 | 50198203  | 51458974  | 5   | 1 | 1  | 1 |
| 36  | 2 | 1 | 148868152 | 186602212 | 2  | 1  | 51466226  | 85353340  | 220 | 1 | 1  | 1 |
| 37  | 2 | 1 | 187217581 | 188706919 | 1  | 1  | 44875779  | 46618126  | 5   | 0 | 0  | 0 |
| 38  | 2 | 1 | 188681005 | 194997187 | 1  | -1 | 46716215  | 53922243  | 23  | 0 | 0  | 0 |
| 39  | 2 | 1 | 194853751 | 238677215 | 1  | 1  | 54011896  | 92847612  | 360 | 0 | 3  | 1 |
| 40  | 2 | 1 | 238854551 | 240612329 | 1  | -1 | 92884276  | 94273927  | 28  | 2 | 1  | 1 |
| 284 | 3 | 1 | 0         | 0         | 3  | 1  | 0         | 0         |     |   |    |   |
| 41  | 3 | 1 | 13908     | 12802380  | 6  | 1  | 104138186 | 116587278 | 78  | 1 | 3  | 2 |
| 42  | 3 | 1 | 12870112  | 15068439  | 6  | 1  | 91409248  | 92992110  | 20  | 1 | 0  | 0 |
| 43  | 3 | 1 | 15177016  | 16274366  | 14 | 1  | 26435643  | 27206563  | 11  | 1 | 1  | 1 |
| 44  | 3 | 1 | 16257940  | 19489675  | 17 | 1  | 49013518  | 52693810  | 12  | 2 | 7  | 1 |
| 45  | 3 | 1 | 22583218  | 27151646  | 14 | -1 | 9819156   | 14346056  | 20  | 0 | 0  | 0 |
| 46  | 3 | 1 | 27206425  | 36639003  | 9  | -1 | 112206455 | 119728309 | 32  | 0 | 0  | 0 |
| 47  | 3 | 1 | 36533468  | 45684813  | 9  | 1  | 119736987 | 125567477 | 99  | 0 | 44 | 1 |
| 48  | 3 | 1 | 47058695  | 51438460  | 9  | -1 | 106912100 | 111621176 | 96  | 1 | 0  | 0 |
| 49  | 3 | 1 | 51442565  | 56783919  | 14 | -1 | 21348804  | 26425061  | 57  | 1 | 1  | 1 |
| 50  | 3 | 1 | 56817208  | 62873406  | 14 | 1  | 3094325   | 9425327   | 34  | 0 | 0  | 0 |
| 51  | 3 | 1 | 62881937  | 73671271  | 6  | 1  | 93068825  | 104101354 | 34  | 0 | 8  | 0 |
| 52  | 3 | 1 | 74208222  | 122080979 | 16 | -1 | 32974133  | 75988496  | 216 | 0 | 7  | 1 |
| 53  | 3 | 1 | 122498736 | 125870910 | 6  | -1 | 88567410  | 91394019  | 36  | 2 | 12 | 1 |
| 54  | 3 | 1 | 126746637 | 144928556 | 9  | -1 | 90806074  | 106825155 | 124 | 0 | 10 | 0 |
| 55  | 3 | 1 | 146018112 | 165098288 | 3  | 1  | 57817000  | 76646784  | 92  | 0 | 0  | 0 |
| 56  | 3 | 1 | 165178140 | 167636941 | 3  | 1  | 28809013  | 31331493  | 16  | 0 | 0  | 0 |
| 57  | 3 | 1 | 167691902 | 175098003 | 3  | -1 | 20308062  | 28669246  | 20  | 0 | 0  | 0 |
| 58  | 3 | 1 | 175141417 | 179577349 | 3  | 1  | 31606197  | 35863475  | 24  | 1 | 2  | 2 |

|     |   |   |           |           |    |    |           |           |     |   |    |   |
|-----|---|---|-----------|-----------|----|----|-----------|-----------|-----|---|----|---|
| 59  | 3 | 1 | 179610506 | 191124056 | 16 | 1  | 19401588  | 30014012  | 84  | 1 | 1  | 1 |
| 60  | 3 | 1 | 191184828 | 193069530 | 16 | -1 | 31371477  | 32598395  | 30  | 1 | 3  | 0 |
| 61  | 3 | 1 | 193300446 | 194904324 | 16 | 1  | 30045772  | 31288254  | 14  | 0 | 0  | 0 |
| 285 | 4 | 1 | 0         | 0         | 4  | 1  | 0         | 0         | 0   | 0 | 22 | 2 |
| 62  | 4 | 1 | 1167139   | 3777554   | 5  | 1  | 31911414  | 33978449  | 40  | 2 | 2  | 1 |
| 63  | 4 | 1 | 4083136   | 8648712   | 5  | -1 | 34187714  | 37198654  | 46  | 1 | 10 | 0 |
| 64  | 4 | 1 | 9483841   | 89156635  | 5  | 1  | 37244007  | 102107677 | 376 | 0 | 1  | 1 |
| 65  | 4 | 1 | 89180085  | 95649989  | 6  | 1  | 59055799  | 65685290  | 28  | 1 | 0  | 0 |
| 66  | 4 | 1 | 95600237  | 121393006 | 3  | -1 | 123028095 | 142973199 | 108 | 0 | 1  | 1 |
| 67  | 4 | 1 | 121746085 | 123305747 | 6  | -1 | 65853959  | 67067773  | 5   | 1 | 0  | 0 |
| 68  | 4 | 1 | 123150984 | 142047547 | 3  | 1  | 36048926  | 52669482  | 61  | 1 | 1  | 1 |
| 69  | 4 | 1 | 142109321 | 151684203 | 8  | -1 | 74840942  | 83153812  | 44  | 1 | 0  | 0 |
| 70  | 4 | 1 | 151775131 | 164008264 | 3  | -1 | 76689378  | 87748391  | 54  | 0 | 0  | 0 |
| 71  | 4 | 1 | 164355361 | 191820878 | 8  | -1 | 40644645  | 66790252  | 112 | 0 | 4  | 0 |
| 286 | 5 | 1 | 0         | 0         | 5  | 1  | 0         | 0         | 0   | 0 | 4  | 2 |
| 72  | 5 | 1 | 232166    | 8088502   | 13 | -1 | 65619862  | 71445385  | 53  | 3 | 1  | 1 |
| 73  | 5 | 1 | 9114360   | 43178863  | 15 | -1 | 3054932   | 32855133  | 147 | 1 | 8  | 2 |
| 74  | 5 | 1 | 43795873  | 95370098  | 13 | -1 | 71722904  | 117113953 | 234 | 2 | 1  | 1 |
| 75  | 5 | 1 | 95435155  | 97752200  | 17 | -1 | 14700277  | 16750546  | 11  | 0 | 0  | 0 |
| 76  | 5 | 1 | 97767743  | 101536374 | 1  | 1  | 94583168  | 97563176  | 7   | 0 | 4  | 0 |
| 77  | 5 | 1 | 102421477 | 109680107 | 17 | 1  | 57945510  | 64651523  | 20  | 0 | 1  | 0 |
| 78  | 5 | 1 | 109922486 | 111890773 | 18 | 1  | 32887608  | 34577096  | 13  | 0 | 0  | 0 |
| 79  | 5 | 1 | 111908709 | 129884865 | 18 | 1  | 44557280  | 60465570  | 66  | 0 | 1  | 0 |
| 80  | 5 | 1 | 130037978 | 133704477 | 11 | -1 | 52110921  | 55334537  | 45  | 1 | 2  | 2 |
| 81  | 5 | 1 | 133724901 | 136965714 | 13 | 1  | 55110588  | 57638659  | 24  | 1 | 3  | 1 |
| 82  | 5 | 1 | 137101134 | 147649159 | 18 | 1  | 34587903  | 44275299  | 141 | 1 | 0  | 0 |
| 83  | 5 | 1 | 147679072 | 150239122 | 18 | -1 | 60781345  | 62921706  | 42  | 0 | 2  | 0 |
| 84  | 5 | 1 | 150454675 | 154410936 | 11 | 1  | 55363355  | 58678332  | 28  | 1 | 2  | 2 |
| 85  | 5 | 1 | 154420157 | 172166470 | 11 | -1 | 32280128  | 49145840  | 79  | 1 | 16 | 0 |
| 86  | 5 | 1 | 174020243 | 177413088 | 13 | 1  | 52734969  | 55096998  | 47  | 1 | 3  | 1 |
| 87  | 5 | 1 | 177571409 | 180712060 | 11 | -1 | 49166183  | 52091562  | 47  | 1 | 7  | 1 |
| 287 | 6 | 1 | 0         | 0         | 6  | 1  | 0         | 0         | 0   | 0 | 1  | 0 |
| 88  | 6 | 1 | 166290    | 20118265  | 13 | 1  | 30055609  | 48119336  | 107 | 0 | 0  | 0 |
| 89  | 6 | 1 | 20123263  | 29058011  | 13 | -1 | 20566921  | 29761202  | 138 | 0 | 12 | 0 |
| 90  | 6 | 1 | 29575435  | 33309207  | 17 | -1 | 33016801  | 36305724  | 157 | 0 | 4  | 0 |
| 91  | 6 | 1 | 33380679  | 39059985  | 17 | 1  | 26122088  | 30157062  | 79  | 0 | 4  | 0 |
| 92  | 6 | 1 | 39304069  | 49670592  | 17 | -1 | 39762428  | 48957172  | 118 | 1 | 4  | 2 |
| 93  | 6 | 1 | 49805094  | 52565237  | 1  | 1  | 18331147  | 21498853  | 15  | 1 | 7  | 1 |
| 94  | 6 | 1 | 52816624  | 55784941  | 9  | -1 | 76389005  | 78939918  | 15  | 1 | 1  | 0 |
| 95  | 6 | 1 | 56226672  | 73866939  | 1  | -1 | 21609842  | 34864074  | 42  | 0 | 4  | 1 |
| 96  | 6 | 1 | 74071367  | 86377229  | 9  | 1  | 79159709  | 89480501  | 47  | 1 | 5  | 1 |
| 97  | 6 | 1 | 87741554  | 100112601 | 4  | -1 | 21018420  | 34563623  | 63  | 1 | 1  | 0 |

|     |   |   |           |           |    |    |           |           |     |   |    |   |
|-----|---|---|-----------|-----------|----|----|-----------|-----------|-----|---|----|---|
| 98  | 6 | 1 | 100403260 | 116823670 | 10 | -1 | 33903968  | 51559320  | 82  | 1 | 2  | 1 |
| 99  | 6 | 1 | 116891651 | 122823933 | 10 | 1  | 51727368  | 57914740  | 23  | 0 | 1  | 0 |
| 100 | 6 | 1 | 122956492 | 149746205 | 10 | -1 | 7413455   | 33643734  | 133 | 2 | 8  | 2 |
| 101 | 6 | 1 | 149991392 | 154558192 | 10 | 1  | 3224365   | 7190386   | 28  | 0 | 2  | 1 |
| 102 | 6 | 1 | 154660191 | 158342015 | 17 | -1 | 3003285   | 6034199   | 17  | 2 | 11 | 2 |
| 103 | 6 | 1 | 159545276 | 166889841 | 17 | -1 | 7030643   | 12454308  | 34  | 2 | 7  | 1 |
| 104 | 6 | 1 | 167281001 | 170066733 | 17 | 1  | 12672381  | 14614856  | 19  | 1 | 2  | 1 |
| 288 | 7 | 1 | 0         | 0         | 7  | 1  | 0         | 0         | 0   | 0 | 4  | 0 |
| 105 | 7 | 1 | 247691    | 6326786   | 5  | 1  | 137592639 | 143002868 | 86  | 1 | 13 | 1 |
| 106 | 7 | 1 | 6785777   | 12176003  | 6  | 1  | 7532656   | 13048376  | 15  | 0 | 0  | 0 |
| 107 | 7 | 1 | 12206507  | 19390376  | 12 | -1 | 27543360  | 34296190  | 22  | 1 | 1  | 1 |
| 108 | 7 | 1 | 19397991  | 22170784  | 12 | -1 | 111604389 | 114250780 | 14  | 0 | 7  | 0 |
| 109 | 7 | 1 | 22898169  | 32723118  | 6  | 1  | 49363444  | 57308117  | 84  | 1 | 2  | 1 |
| 110 | 7 | 1 | 32812352  | 35985597  | 9  | 1  | 22553875  | 25692298  | 14  | 1 | 3  | 1 |
| 111 | 7 | 1 | 36170789  | 43252330  | 13 | -1 | 13643397  | 20462445  | 37  | 0 | 5  | 1 |
| 112 | 7 | 1 | 43555304  | 54768752  | 11 | 1  | 5584810   | 16912546  | 68  | 1 | 66 | 0 |
| 113 | 7 | 1 | 65496178  | 70582019  | 5  | -1 | 128791601 | 132651725 | 5   | 0 | 15 | 2 |
| 114 | 7 | 1 | 71370997  | 73342666  | 5  | -1 | 132740372 | 133969586 | 39  | 2 | 30 | 1 |
| 115 | 7 | 1 | 75349329  | 83808903  | 5  | -1 | 10906478  | 19817355  | 27  | 0 | 0  | 0 |
| 116 | 7 | 1 | 83869761  | 91181145  | 5  | 1  | 3005430   | 10676763  | 35  | 0 | 1  | 0 |
| 117 | 7 | 1 | 91294846  | 96034401  | 6  | 1  | 3063861   | 7436221   | 28  | 0 | 1  | 0 |
| 118 | 7 | 1 | 96220972  | 97763253  | 5  | 1  | 143137630 | 144385607 | 26  | 0 | 5  | 0 |
| 119 | 7 | 1 | 98062835  | 100597327 | 5  | -1 | 134738623 | 137051964 | 77  | 1 | 8  | 1 |
| 120 | 7 | 1 | 100871379 | 103679611 | 5  | 1  | 19857400  | 22263918  | 25  | 1 | 1  | 1 |
| 121 | 7 | 1 | 103693500 | 106257263 | 12 | -1 | 25222507  | 27510271  | 21  | 0 | 1  | 1 |
| 122 | 7 | 1 | 106280477 | 110619572 | 12 | -1 | 34300543  | 38950344  | 18  | 1 | 0  | 0 |
| 123 | 7 | 1 | 110623352 | 148748260 | 6  | 1  | 13072676  | 49194473  | 289 | 1 | 2  | 2 |
| 124 | 7 | 1 | 148804843 | 155395463 | 5  | 1  | 22707921  | 28257720  | 49  | 3 | 1  | 1 |
| 125 | 7 | 1 | 155481009 | 157236644 | 12 | -1 | 110282084 | 111552862 | 10  | 1 | 1  | 1 |
| 289 | 8 | 1 | 0         | 0         | 8  | 1  | 0         | 0         | 0   | 0 | 5  | 1 |
| 126 | 8 | 1 | 297461    | 7385340   | 8  | 1  | 13927047  | 20676019  | 30  | 2 | 12 | 2 |
| 127 | 8 | 1 | 8032078   | 9556982   | 8  | -1 | 33750059  | 35127206  | 7   | 1 | 0  | 0 |
| 128 | 8 | 1 | 9574409   | 11804604  | 14 | -1 | 54178729  | 55725318  | 26  | 0 | 3  | 0 |
| 129 | 8 | 1 | 12337758  | 17831562  | 8  | 1  | 35148323  | 40543238  | 22  | 0 | 0  | 0 |
| 130 | 8 | 1 | 17869314  | 20051547  | 8  | 1  | 66834045  | 68588298  | 12  | 0 | 0  | 0 |
| 131 | 8 | 1 | 20081723  | 29587999  | 14 | -1 | 55735583  | 63321567  | 95  | 0 | 0  | 0 |
| 132 | 8 | 1 | 28763474  | 36481413  | 8  | -1 | 26424531  | 33745561  | 32  | 0 | 0  | 0 |
| 133 | 8 | 1 | 36402623  | 37499528  | 8  | 1  | 24580824  | 25784502  | 11  | 0 | 0  | 0 |
| 134 | 8 | 1 | 37468035  | 41896742  | 8  | -1 | 21166936  | 24571771  | 45  | 0 | 22 | 0 |
| 135 | 8 | 1 | 47438619  | 48888993  | 16 | -1 | 14138531  | 15608082  | 9   | 0 | 2  | 0 |
| 136 | 8 | 1 | 49786902  | 55814550  | 1  | -1 | 3053130   | 9458216   | 21  | 0 | 0  | 0 |
| 137 | 8 | 1 | 55846437  | 62052359  | 4  | 1  | 3000610   | 9217713   | 28  | 0 | 0  | 0 |

|     |    |   |           |           |    |    |           |           |     |   |    |   |
|-----|----|---|-----------|-----------|----|----|-----------|-----------|-----|---|----|---|
| 138 | 8  | 1 | 62059799  | 63377944  | 4  | -1 | 19523484  | 21002478  | 3   | 0 | 0  | 0 |
| 139 | 8  | 1 | 63445049  | 66455796  | 3  | 1  | 15921269  | 19629727  | 10  | 0 | 1  | 0 |
| 140 | 8  | 1 | 66471714  | 75156137  | 1  | 1  | 9599302   | 18145330  | 48  | 0 | 0  | 0 |
| 141 | 8  | 1 | 75228363  | 85643329  | 3  | 1  | 3368678   | 15372220  | 33  | 0 | 1  | 1 |
| 142 | 8  | 1 | 85653020  | 96246458  | 4  | -1 | 9258417   | 19488529  | 53  | 1 | 3  | 0 |
| 143 | 8  | 1 | 96459282  | 143732083 | 15 | 1  | 32888006  | 77422816  | 257 | 1 | 3  | 1 |
| 290 | 9  | 1 | 0         | 0         | 9  | 1  | 0         | 0         | 0   | 0 | 8  | 1 |
| 144 | 9  | 1 | 470368    | 6819140   | 19 | 1  | 24736061  | 29964395  | 44  | 1 | 0  | 0 |
| 145 | 9  | 1 | 6897124   | 27609402  | 4  | 1  | 71478215  | 92666911  | 74  | 0 | 0  | 0 |
| 146 | 9  | 1 | 27637433  | 38782166  | 4  | 1  | 34605534  | 44701744  | 121 | 0 | 52 | 1 |
| 147 | 9  | 1 | 62064465  | 73833427  | 19 | -1 | 13594243  | 24464344  | 54  | 1 | 0  | 0 |
| 148 | 9  | 1 | 74052473  | 77197040  | 4  | 1  | 67975509  | 71406079  | 9   | 0 | 0  | 0 |
| 149 | 9  | 1 | 77281832  | 81367322  | 13 | 1  | 57669114  | 60310703  | 24  | 0 | 4  | 0 |
| 150 | 9  | 1 | 81736793  | 85669928  | 13 | 1  | 50233107  | 52648221  | 19  | 1 | 5  | 2 |
| 151 | 9  | 1 | 85833643  | 87756279  | 13 | -1 | 48195217  | 49403493  | 27  | 1 | 6  | 1 |
| 152 | 9  | 1 | 88158123  | 90472665  | 13 | 1  | 61669473  | 63179589  | 20  | 1 | 6  | 1 |
| 153 | 9  | 1 | 90863973  | 114593179 | 4  | 1  | 44704519  | 67869671  | 147 | 1 | 1  | 1 |
| 154 | 9  | 1 | 114639609 | 119075018 | 2  | 1  | 35223906  | 39671056  | 66  | 1 | 1  | 1 |
| 155 | 9  | 1 | 119079976 | 122123110 | 2  | -1 | 32671493  | 35212869  | 41  | 2 | 4  | 2 |
| 156 | 9  | 1 | 122186517 | 125416073 | 2  | 1  | 30113940  | 32610065  | 63  | 2 | 1  | 1 |
| 157 | 9  | 1 | 125435545 | 127056293 | 2  | -1 | 28837980  | 30088502  | 19  | 1 | 6  | 2 |
| 158 | 9  | 1 | 127289107 | 129545804 | 2  | 1  | 27179005  | 28799332  | 24  | 2 | 5  | 2 |
| 159 | 9  | 1 | 129655973 | 132429794 | 2  | -1 | 24877776  | 26922886  | 59  | 2 | 1  | 1 |
| 291 | 10 | 1 | 0         | 0         | 10 | 1  | 0         | 0         | 0   | 0 | 2  | 0 |
| 160 | 10 | 1 | 78916     | 5745163   | 13 | -1 | 3353248   | 9739192   | 29  | 1 | 3  | 2 |
| 161 | 10 | 1 | 5859767   | 15435636  | 2  | -1 | 3038110   | 11881531  | 55  | 1 | 0  | 0 |
| 162 | 10 | 1 | 15457152  | 27266604  | 2  | 1  | 12110678  | 23465669  | 56  | 0 | 3  | 0 |
| 163 | 10 | 1 | 27474646  | 28632788  | 18 | 1  | 6589354   | 7775646   | 6   | 1 | 1  | 1 |
| 164 | 10 | 1 | 28686192  | 32412844  | 18 | 1  | 3346777   | 6396290   | 19  | 0 | 1  | 1 |
| 165 | 10 | 1 | 32470395  | 34923709  | 8  | -1 | 127041236 | 129164473 | 10  | 1 | 5  | 1 |
| 166 | 10 | 1 | 35477421  | 36839082  | 18 | -1 | 7849395   | 9259079   | 4   | 1 | 25 | 1 |
| 167 | 10 | 1 | 42582827  | 45461049  | 6  | -1 | 117063610 | 119191868 | 25  | 1 | 14 | 1 |
| 168 | 10 | 1 | 46281925  | 50420366  | 14 | -1 | 27251850  | 29336339  | 52  | 2 | 9  | 1 |
| 169 | 10 | 1 | 50761406  | 53382755  | 19 | -1 | 29997899  | 32187321  | 12  | 0 | 0  | 0 |
| 170 | 10 | 1 | 54012964  | 73635659  | 10 | -1 | 59308078  | 75301743  | 103 | 0 | 0  | 0 |
| 171 | 10 | 1 | 73648783  | 80918463  | 14 | 1  | 15403654  | 21017937  | 57  | 0 | 0  | 0 |
| 172 | 10 | 1 | 80328976  | 87820528  | 14 | -1 | 29351985  | 36299034  | 38  | 1 | 3  | 1 |
| 173 | 10 | 1 | 88141751  | 120126498 | 19 | 1  | 32264645  | 61144810  | 291 | 1 | 1  | 1 |
| 174 | 10 | 1 | 120128472 | 134286760 | 7  | 1  | 118219394 | 131033103 | 100 | 2 | 2  | 1 |
| 292 | 11 | 1 | 0         | 0         | 11 | 1  | 0         | 0         | 0   | 0 | 3  | 1 |
| 175 | 11 | 1 | 371944    | 1812080   | 7  | -1 | 132256401 | 133113643 | 48  | 1 | 31 | 0 |
| 176 | 11 | 1 | 4160230   | 18439115  | 7  | 1  | 91904633  | 106151720 | 183 | 0 | 2  | 0 |

|     |    |   |           |           |    |    |           |           |     |   |    |   |
|-----|----|---|-----------|-----------|----|----|-----------|-----------|-----|---|----|---|
| 177 | 11 | 1 | 18551546  | 27288357  | 7  | 1  | 35680929  | 45375815  | 50  | 0 | 0  | 0 |
| 178 | 11 | 1 | 27645699  | 45179365  | 2  | -1 | 95402074  | 111931447 | 71  | 1 | 1  | 1 |
| 179 | 11 | 1 | 45191144  | 46553540  | 2  | 1  | 94316590  | 95394372  | 10  | 0 | 0  | 0 |
| 180 | 11 | 1 | 46561366  | 60144522  | 2  | -1 | 85376098  | 94307146  | 125 | 0 | 10 | 0 |
| 181 | 11 | 1 | 60667414  | 65634221  | 19 | -1 | 7883094   | 12395900  | 124 | 0 | 37 | 0 |
| 182 | 11 | 1 | 66713833  | 71230124  | 19 | 1  | 4142318   | 7572828   | 157 | 1 | 3  | 2 |
| 183 | 11 | 1 | 71300640  | 73541758  | 7  | -1 | 134240159 | 135758348 | 20  | 2 | 6  | 1 |
| 184 | 11 | 1 | 73959293  | 91605527  | 7  | -1 | 76920265  | 91903868  | 134 | 0 | 12 | 0 |
| 185 | 11 | 1 | 92192136  | 109629127 | 9  | -1 | 3257414   | 18376264  | 93  | 1 | 1  | 1 |
| 186 | 11 | 1 | 109647080 | 137397151 | 9  | -1 | 25957960  | 54501406  | 257 | 0 | 0  | 0 |
| 293 | 12 | 1 | 0         | 0         | 12 | 1  | 0         | 0         | 0   | 0 | 1  | 0 |
| 187 | 12 | 1 | 47544     | 2629892   | 6  | -1 | 119423515 | 122264710 | 20  | 1 | 3  | 2 |
| 188 | 12 | 1 | 2776485   | 9063033   | 6  | -1 | 122441094 | 129360237 | 118 | 2 | 2  | 2 |
| 189 | 12 | 1 | 9089161   | 32989912  | 6  | 1  | 129405306 | 150310887 | 168 | 1 | 5  | 1 |
| 190 | 12 | 1 | 33608291  | 55131873  | 15 | 1  | 90469883  | 104544877 | 219 | 1 | 4  | 1 |
| 191 | 12 | 1 | 55477244  | 72945353  | 10 | -1 | 114512821 | 131019519 | 181 | 1 | 12 | 0 |
| 192 | 12 | 1 | 73205901  | 75997861  | 10 | 1  | 111646334 | 114410251 | 10  | 0 | 0  | 0 |
| 193 | 12 | 1 | 76115436  | 103439244 | 10 | -1 | 86875692  | 111565877 | 128 | 1 | 3  | 2 |
| 194 | 12 | 1 | 103496056 | 107287155 | 10 | 1  | 82803256  | 86103031  | 31  | 1 | 0  | 0 |
| 195 | 12 | 1 | 107313400 | 109547766 | 5  | 1  | 111085942 | 112773922 | 30  | 1 | 1  | 1 |
| 196 | 12 | 1 | 109605648 | 120358974 | 5  | -1 | 112862080 | 120701272 | 116 | 0 | 0  | 0 |
| 197 | 12 | 1 | 120431830 | 130562871 | 5  | 1  | 120717463 | 127828429 | 89  | 0 | 11 | 0 |
| 294 | 13 | 1 | 0         | 0         | 13 | 1  | 0         | 0         | 0   | 0 | 19 | 0 |
| 198 | 13 | 1 | 18187676  | 21343646  | 14 | 1  | 47784402  | 50243982  | 24  | 0 | 0  | 0 |
| 199 | 13 | 1 | 21641475  | 22861222  | 14 | -1 | 51596223  | 52392288  | 7   | 0 | 16 | 1 |
| 200 | 13 | 1 | 24810646  | 32391851  | 5  | 1  | 145185613 | 151005718 | 51  | 2 | 1  | 1 |
| 201 | 13 | 1 | 32474473  | 39232840  | 3  | -1 | 52717637  | 57680022  | 30  | 0 | 3  | 0 |
| 202 | 13 | 1 | 39492467  | 47782086  | 14 | -1 | 63468306  | 70533960  | 58  | 1 | 10 | 1 |
| 203 | 13 | 1 | 48224187  | 50354776  | 14 | 1  | 52423915  | 54060401  | 16  | 1 | 13 | 1 |
| 204 | 13 | 1 | 51194296  | 101505368 | 14 | 1  | 70539080  | 116001472 | 98  | 0 | 7  | 0 |
| 205 | 13 | 1 | 101902085 | 113413125 | 8  | 1  | 4741267   | 13786467  | 49  | 1 | 1  | 1 |
| 295 | 14 | 1 | 0         | 0         | 14 | 1  | 0         | 0         | 0   | 0 | 5  | 0 |
| 206 | 14 | 1 | 17612765  | 22515468  | 14 | 1  | 41987514  | 47406579  | 147 | 0 | 0  | 0 |
| 207 | 14 | 1 | 22545397  | 49528441  | 12 | 1  | 39020997  | 65540827  | 104 | 0 | 5  | 0 |
| 208 | 14 | 1 | 50020857  | 55947442  | 14 | 1  | 36669203  | 41711810  | 43  | 0 | 1  | 1 |
| 209 | 14 | 1 | 55990958  | 103367171 | 12 | 1  | 65571628  | 107711848 | 401 | 4 | 35 | 3 |
| 296 | 15 | 1 | 0         | 0         | 15 | 1  | 0         | 0         | 0   | 0 | 32 | 1 |
| 210 | 15 | 1 | 21728652  | 24513004  | 7  | -1 | 45788134  | 49015198  | 7   | 2 | 5  | 1 |
| 211 | 15 | 1 | 24758877  | 25909266  | 7  | 1  | 53990869  | 55045944  | 8   | 0 | 5  | 1 |
| 212 | 15 | 1 | 26522378  | 27825905  | 7  | 1  | 52481896  | 53745919  | 10  | 2 | 6  | 2 |
| 213 | 15 | 1 | 28154602  | 29941847  | 2  | -1 | 113175622 | 114776461 | 17  | 1 | 5  | 0 |
| 214 | 15 | 1 | 30283818  | 46855367  | 2  | 1  | 114843098 | 128049851 | 175 | 0 | 5  | 0 |

|     |    |   |          |          |    |    |           |           |     |   |    |   |
|-----|----|---|----------|----------|----|----|-----------|-----------|-----|---|----|---|
| 215 | 15 | 1 | 47519529 | 71896364 | 9  | -1 | 57376145  | 76368446  | 239 | 0 | 3  | 0 |
| 216 | 15 | 1 | 71984258 | 74282355 | 9  | 1  | 55648761  | 57407518  | 20  | 0 | 0  | 0 |
| 217 | 15 | 1 | 74102528 | 76087247 | 9  | -1 | 89744190  | 90766961  | 28  | 0 | 4  | 0 |
| 218 | 15 | 1 | 76247123 | 78535867 | 7  | -1 | 72344192  | 74469090  | 18  | 0 | 16 | 0 |
| 219 | 15 | 1 | 79014608 | 80632267 | 7  | 1  | 70854910  | 72326056  | 17  | 1 | 25 | 1 |
| 220 | 15 | 1 | 81971868 | 87927149 | 7  | 1  | 64852001  | 70357616  | 64  | 1 | 1  | 1 |
| 221 | 15 | 1 | 88105781 | 99178600 | 7  | -1 | 55054225  | 64775969  | 47  | 1 | 1  | 1 |
| 297 | 16 | 1 | 0        | 0        | 16 | 1  | 0         | 0         | 0   | 0 | 10 | 0 |
| 222 | 16 | 1 | 238056   | 3258445  | 17 | -1 | 22726067  | 25470117  | 161 | 0 | 4  | 1 |
| 223 | 16 | 1 | 3315019  | 16052869 | 16 | 1  | 3157694   | 13950902  | 113 | 2 | 7  | 1 |
| 224 | 16 | 1 | 16510398 | 30601232 | 7  | 1  | 106321383 | 118165833 | 215 | 1 | 39 | 1 |
| 225 | 16 | 1 | 37104394 | 60677388 | 8  | 1  | 84966092  | 107402587 | 239 | 0 | 5  | 1 |
| 226 | 16 | 1 | 60889011 | 65285538 | 8  | -1 | 107409776 | 111046988 | 45  | 1 | 1  | 1 |
| 227 | 16 | 1 | 65299456 | 81429915 | 8  | 1  | 111019397 | 123612140 | 179 | 2 | 13 | 1 |
| 298 | 17 | 1 | 0        | 0        | 17 | 1  | 0         | 0         | 0   | 0 | 2  | 1 |
| 228 | 17 | 1 | 119409   | 4958243  | 11 | -1 | 72968703  | 77353786  | 91  | 1 | 2  | 1 |
| 229 | 17 | 1 | 5001486  | 7122509  | 11 | 1  | 70977976  | 72961122  | 48  | 2 | 2  | 1 |
| 230 | 17 | 1 | 7237458  | 16832092 | 11 | -1 | 62647375  | 70901238  | 138 | 1 | 10 | 1 |
| 231 | 17 | 1 | 17258267 | 20380049 | 11 | 1  | 60197321  | 62644618  | 62  | 1 | 20 | 1 |
| 232 | 17 | 1 | 25413494 | 28606967 | 11 | -1 | 77360300  | 79941136  | 66  | 0 | 5  | 0 |
| 233 | 17 | 1 | 28915919 | 34214242 | 11 | 1  | 79945669  | 84324899  | 62  | 0 | 1  | 0 |
| 234 | 17 | 1 | 34288120 | 35595817 | 11 | -1 | 84447035  | 85526140  | 11  | 0 | 0  | 0 |
| 235 | 17 | 1 | 35164483 | 44945783 | 11 | 1  | 98088940  | 105496519 | 269 | 0 | 4  | 0 |
| 236 | 17 | 1 | 45228937 | 57890676 | 11 | -1 | 87147057  | 98078685  | 132 | 0 | 0  | 0 |
| 237 | 17 | 1 | 57636428 | 60006721 | 11 | 1  | 85591505  | 87094880  | 24  | 0 | 3  | 0 |
| 238 | 17 | 1 | 60096201 | 80049779 | 11 | 1  | 105818263 | 122565050 | 273 | 0 | 0  | 0 |
| 299 | 18 | 1 | 0        | 0        | 18 | 1  | 0         | 0         | 0   | 0 | 10 | 0 |
| 239 | 18 | 1 | 1010599  | 2726243  | 17 | 1  | 92634515  | 94122695  | 3   | 0 | 0  | 0 |
| 240 | 18 | 1 | 2789316  | 10083804 | 17 | -1 | 64698128  | 70684298  | 35  | 1 | 1  | 1 |
| 241 | 18 | 1 | 10146600 | 11728748 | 18 | 1  | 63010089  | 63941258  | 6   | 0 | 1  | 0 |
| 242 | 18 | 1 | 11958415 | 14010083 | 18 | 1  | 67455980  | 68786632  | 21  | 0 | 11 | 1 |
| 243 | 18 | 1 | 18405876 | 41210522 | 18 | 1  | 9944677   | 31718535  | 85  | 1 | 0  | 0 |
| 244 | 18 | 1 | 41660037 | 54333295 | 18 | -1 | 68830429  | 80544349  | 56  | 0 | 0  | 0 |
| 245 | 18 | 1 | 54357724 | 58094474 | 18 | 1  | 63978946  | 67352781  | 26  | 0 | 1  | 0 |
| 246 | 18 | 1 | 58183142 | 65698808 | 1  | 1  | 104356101 | 112970313 | 26  | 0 | 1  | 1 |
| 247 | 18 | 1 | 66164603 | 77515070 | 18 | -1 | 80626223  | 91128280  | 38  | 1 | 0  | 0 |
| 300 | 19 | 1 | 0        | 0        | 19 | 1  | 0         | 0         | 0   | 0 | 5  | 1 |
| 248 | 19 | 1 | 221165   | 4317297  | 10 | 1  | 79984403  | 82123415  | 142 | 1 | 1  | 1 |
| 249 | 19 | 1 | 4323993  | 7034643  | 17 | 1  | 55014349  | 56536336  | 68  | 1 | 6  | 0 |
| 250 | 19 | 1 | 7221494  | 8277183  | 8  | 1  | 3050238   | 4438387   | 38  | 1 | 42 | 2 |
| 251 | 19 | 1 | 10042462 | 11820093 | 9  | 1  | 20698640  | 22209084  | 63  | 1 | 28 | 1 |
| 252 | 19 | 1 | 12888823 | 15027656 | 8  | -1 | 83263813  | 84801237  | 59  | 1 | 68 | 1 |

|     |    |   |           |           |    |    |           |               |       |     |      |     |
|-----|----|---|-----------|-----------|----|----|-----------|---------------|-------|-----|------|-----|
| 253 | 19 | 1 | 17680030  | 20268144  | 8  | -1 | 69189072  | 71105965      | 94    | 1   | 52   | 0   |
| 254 | 19 | 1 | 29210927  | 30707429  | 7  | 1  | 29252019  | 30626434      | 3     | 0   | 1    | 1   |
| 255 | 19 | 1 | 30721582  | 48998849  | 7  | -1 | 10994878  | 28800729      | 420   | 2   | 8    | 2   |
| 256 | 19 | 1 | 49444685  | 52717241  | 7  | -1 | 32900963  | 35524711      | 153   | 2   | 58   | 2   |
| 257 | 19 | 1 | 55244810  | 58507181  | 7  | 1  | 3044586   | 6319388       | 104   | 1   | 62   | 0   |
| 301 | 20 | 1 | 0         | 0         | 20 | 1  | 0         | 0             |       |     |      |     |
| 258 | 20 | 1 | 56382     | 1430309   | 2  | -1 | 152295190 | 153316051     | 29    | 1   | 7    | 2   |
| 259 | 20 | 1 | 1735540   | 25591857  | 2  | 1  | 130446385 | 152045507     | 176   | 2   | 8    | 1   |
| 260 | 20 | 1 | 29633436  | 62782431  | 2  | 1  | 153322570 | 180185571     | 423   | 1   | 2    | 1   |
| 302 | 21 | 1 | 0         | 0         | 21 | 1  | 0         | 0             | 0     | 0   | 13   | 0   |
| 261 | 21 | 1 | 12181093  | 39985357  | 16 | 1  | 76091640  | 99151131      | 140   | 0   | 0    | 0   |
| 262 | 21 | 1 | 40038764  | 41625800  | 17 | 1  | 30171030  | 31278245      | 24    | 0   | 3    | 1   |
| 263 | 21 | 1 | 41703939  | 44590131  | 10 | -1 | 76644938  | 78878387      | 51    | 2   | 1    | 1   |
| 303 | 22 | 1 | 0         | 0         | 22 | 1  | 0         | 0             | 0     | 0   | 13   | 0   |
| 264 | 22 | 1 | 14522311  | 15543052  | 6  | 1  | 121271024 | 122024308     | 14    | 0   | 16   | 0   |
| 265 | 22 | 1 | 16258382  | 19028891  | 16 | -1 | 16348074  | 18445424      | 75    | 1   | 35   | 1   |
| 266 | 22 | 1 | 20049057  | 21700324  | 10 | -1 | 75608420  | 76436129      | 45    | 1   | 4    | 1   |
| 267 | 22 | 1 | 21898480  | 25852324  | 5  | -1 | 108525546 | 111025279     | 26    | 0   | 0    | 0   |
| 268 | 22 | 1 | 25864689  | 28696987  | 11 | -1 | 3002827   | 5412772       | 63    | 1   | 23   | 1   |
| 269 | 22 | 1 | 30362135  | 32596104  | 8  | 1  | 72342157  | 74778783      | 8     | 0   | 0    | 0   |
| 270 | 22 | 1 | 32645518  | 47682498  | 15 | 1  | 77515390  | 90411316      | 250   | 1   | 3    | 1   |
| 304 | X  | 1 | 0         | 0         | X  | 1  | 0         | 0             | 0     | 0   | 37   | 1   |
| 271 | X  | 1 | 9515943   | 22633747  | X  | -1 | 132105699 | 147161228     | 77    | 1   | 1    | 1   |
| 272 | X  | 1 | 22668831  | 35421963  | X  | -1 | 61476978  | 77241241      | 50    | 1   | 2    | 0   |
| 273 | X  | 1 | 35727410  | 46666299  | X  | 1  | 6492463   | 18249797      | 78    | 0   | 10   | 0   |
| 274 | X  | 1 | 47119661  | 48754822  | X  | -1 | 3000663   | 4531760       | 43    | 0   | 0    | 0   |
| 275 | X  | 1 | 48755134  | 49925306  | X  | -1 | 5390172   | 6271941       | 5     | 0   | 0    | 0   |
| 276 | X  | 1 | 50043614  | 52060063  | X  | -1 | 127515295 | 129338565     | 31    | 0   | 4    | 0   |
| 277 | X  | 1 | 52452334  | 53848687  | X  | 1  | 129944210 | 130870771     | 9     | 0   | 7    | 0   |
| 278 | X  | 1 | 58777251  | 78634578  | X  | 1  | 77847510  | 94046298      | 106   | 0   | 0    | 0   |
| 279 | X  | 1 | 78691856  | 83712889  | X  | -1 | 100126658 | 105951929     | 11    | 0   | 7    | 0   |
| 280 | X  | 1 | 89131271  | 109536724 | X  | 1  | 106791973 | 126848896     | 141   | 0   | 4    | 0   |
| 281 | X  | 1 | 110065695 | 148681251 | X  | 1  | 18632704  | 58648190      | 273   | 1   | 8    | 1   |
|     |    |   |           |           |    |    |           | <b>Totals</b> | 21005 | 189 | 1981 | 185 |



## Genes spanning multiple blocks/gaps

'xxx gbg' means the gene starts in the gap after block xxx,  
then goes into the following block, then into the following gap.

[ENSG00000153130](#): 68 bgb  
[ENSG00000154814](#): 43 bgb  
[ENSG00000095492](#): 173 bgb  
[ENSG00000135165](#): 113 gbg  
[ENSG00000173724](#): 12 bgb  
[ENSG00000002933](#): 123 bgb
