# Supplementary material
Source: PubMed Central journal article supplement (PMC164646)
Supplement: pnas_1330369100_3.pdf [file pnas_1330369100_3.pdf]

## Appendix. Potential hidden blocks

111 potential sites based on the anchors used to build the blocks:

[21 small clusters of anchors](#)

[90 isolated anchors](#)

[81 potential sites based on genes \(as determined by ensembl\)](#)

### Key

- B1-B281 are the syteny blocks
- Hxxx, chr..., ENS..., are external identifiers for the blocks that were tested.
- B89 -1 6 20123263 29058011 13 20566921 29761202  
means block 89, opposite strands (-1), human chromosome 6 nucleotides 20123263-29058011, mouse chromosome 13 nucleotides 20566921-29761202
- Each listed potential hidden block is shown first between the two human blocks where it fits, and second between the two mouse blocks where it fits.

### Potential hidden blocks that form a small cluster of anchors

(1) H181:

```
B42 1 3 12870112 15068439 6 91409248 92992110
H181 1 3 15122612 15157104 9 106830795 106862696
B43 1 3 15177016 16274366 14 26435643 27206563
```

```
B54 -1 3 126746637 144928556 9 90806074 106825155
H181 1 3 15122612 15157104 9 106830795 106862696
B48 -1 3 47058695 51438460 9 106912100 111621176
```

(2) H229:

```
B54 -1 3 126746637 144928556 9 90806074 106825155
H229 1 3 145270526 145610755 13 29776899 30026476
B55 1 3 146018112 165098288 3 57817000 76646784
```

```
B89 -1 6 20123263 29058011 13 20566921 29761202
H229 1 3 145270526 145610755 13 29776899 30026476
B88 1 6 166290 20118265 13 30055609 48119336
```

(3) H230:

```
B54 -1 3 126746637 144928556 9 90806074 106825155
H230 -1 3 145402510 145911312 3 19693545 20064461
B55 1 3 146018112 165098288 3 57817000 76646784
```

```
B139 1 8 63445049 66455796 3 15921269 19629727
H230 -1 3 145402510 145911312 3 19693545 20064461
B57 -1 3 167691902 175098003 3 20308062 28669246
```

(4) H321:

B77 1 5 102421477 109680107 17 57945510 64651523  
H321 -1 5 109697779 109722600 18 31756061 31784780  
B78 1 5 109922486 111890773 18 32887608 34577096

B243 1 18 18405876 41210522 18 9944677 31718535  
H321 -1 5 109697779 109722600 18 31756061 31784780  
B31 -1 2 124480451 126084332 18 31809356 32842104

(5) H332:

B81 1 5 133724901 136965714 13 55110588 57638659  
H332 1 5 137011893 137099450 18 44446423 44533009  
B82 1 5 137101134 147649159 18 34587903 44275299

B82 1 5 137101134 147649159 18 34587903 44275299  
H332 1 5 137011893 137099450 18 44446423 44533009  
B79 1 5 111908709 129884865 18 44557280 60465570

(6) H422:

B108 -1 7 19397991 22170784 12 111604389 114250780  
H422 1 7 22246577 22415045 5 28342634 28520831  
B109 1 7 22898169 32723118 6 49363444 57308117

B124 1 7 148804843 155395463 5 22707921 28257720  
H422 1 7 22246577 22415045 5 28342634 28520831  
B18 1 2 26317413 28924420 5 28612308 31149741

(7) H423:

B108 -1 7 19397991 22170784 12 111604389 114250780  
H423 1 7 22494102 22892777 5 22290352 22645163  
B109 1 7 22898169 32723118 6 49363444 57308117

B120 1 7 100871379 103679611 5 19857400 22263918  
H423 1 7 22494102 22892777 5 22290352 22645163  
B124 1 7 148804843 155395463 5 22707921 28257720

(8) H441:

B112 1 7 43555304 54768752 11 5584810 16912546  
H441 1 7 55496415 55624818 5 128004634 128303225  
B113 -1 7 65496178 70582019 5 128791601 132651725

B197 1 12 120431830 130562871 5 120717463 127828429  
H441 1 7 55496415 55624818 5 128004634 128303225  
B113 -1 7 65496178 70582019 5 128791601 132651725

(9) H445:

B112 1 7 43555304 54768752 11 5584810 16912546  
H445 1 7 64180983 65062351 5 128436150 128671403  
B113 -1 7 65496178 70582019 5 128791601 132651725

B197 1 12 120431830 130562871 5 120717463 127828429  
H445 1 7 64180983 65062351 5 128436150 128671403  
B113 -1 7 65496178 70582019 5 128791601 132651725

(10) H449:

B114 -1 7 71370997 73342666 5 132740372 133969586  
H449 1 7 73698194 74680105 5 134009458 134650857  
B115 -1 7 75349329 83808903 5 10906478 19817355

B114 -1 7 71370997 73342666 5 132740372 133969586  
H449 1 7 73698194 74680105 5 134009458 134650857  
B119 -1 7 98062835 100597327 5 134738623 137051964

(11) H521:

B142 -1 8 85653020 96246458 4 9258417 19488529  
H521 1 8 96260763 96366846 13 64402990 64496433  
B143 1 8 96459282 143732083 15 32888006 77422816

B152 1 9 88158123 90472665 13 61669473 63179589  
H521 1 8 96260763 96366846 13 64402990 64496433  
B72 -1 5 232166 8088502 13 65619862 71445385

(12) H550:

B146 1 9 27637433 38782166 4 34605534 44701744  
H550 1 9 38982971 39058603 13 63290872 63361584  
B147 -1 9 62064465 73833427 19 13594243 24464344

B152 1 9 88158123 90472665 13 61669473 63179589  
H550 1 9 38982971 39058603 13 63290872 63361584  
B72 -1 5 232166 8088502 13 65619862 71445385

(13) H552:

B146 1 9 27637433 38782166 4 34605534 44701744  
H552 1 9 46797554 47142376 13 63520921 63719969  
B147 -1 9 62064465 73833427 19 13594243 24464344

B152 1 9 88158123 90472665 13 61669473 63179589  
H552 1 9 46797554 47142376 13 63520921 63719969  
B72 -1 5 232166 8088502 13 65619862 71445385

(14) H621:

B169 -1 10 50761406 53382755 19 29997899 32187321  
H621 1 10 53448304 53456255 18 80565788 80606681  
B170 -1 10 54012964 73635659 10 59308078 75301743

B244 -1 18 41660037 54333295 18 68830429 80544349  
H621 1 10 53448304 53456255 18 80565788 80606681  
B247 -1 18 66164603 77515070 18 80626223 91128280

(15) H650:

B175 -1 11 371944 1812080 7 132256401 133113643  
H650 1 11 2384970 3247328 7 133442142 134184007  
B176 1 11 4160230 18439115 7 91904633 106151720

B175 -1 11 371944 1812080 7 132256401 133113643  
H650 1 11 2384970 3247328 7 133442142 134184007  
B183 -1 11 71300640 73541758 7 134240159 135758348

(16) H766:

B202 -1 13 39492467 47782086 14 63468306 70533960  
H766 -1 13 47822112 48154094 14 50343358 50699866  
B203 1 13 48224187 50354776 14 52423915 54060401

B198 1 13 18187676 21343646 14 47784402 50243982  
H766 -1 13 47822112 48154094 14 50343358 50699866  
B199 -1 13 21641475 22861222 14 51596223 52392288

(17) H768:

B203 1 13 48224187 50354776 14 52423915 54060401  
H768 1 13 50504326 51016719 8 20720874 20989705  
B204 1 13 51194296 101505368 14 70539080 116001472

B126 1 8 297461 7385340 8 13927047 20676019  
H768 1 13 50504326 51016719 8 20720874 20989705  
B134 -1 8 37468035 41896742 8 21166936 24571771

(18) H825:

B214 1 15 30283818 46855367 2 114843098 128049851  
H825 1 15 46908203 47495245 9 54546541 55052164  
B215 -1 15 47519529 71896364 9 57376145 76368446

B186 -1 11 109647080 137397151 9 25957960 54501406  
H825 1 15 46908203 47495245 9 54546541 55052164  
B216 1 15 71984258 74282355 9 55648761 57407518

(19) H856:

B223 1 16 3315019 16052869 16 3157694 13950902  
H856 1 16 16080367 16234384 7 35558201 35661655  
B224 1 16 16510398 30601232 7 106321383 118165833

B256 -1 19 49444685 52717241 7 32900963 35524711  
H856 1 16 16080367 16234384 7 35558201 35661655  
B177 1 11 18551546 27288357 7 35680929 45375815

(20) H959:

B243 1 18 18405876 41210522 18 9944677 31718535  
H959 1 18 41459347 41460109 9 54529057 54529946  
B244 -1 18 41660037 54333295 18 68830429 80544349

B186 -1 11 109647080 137397151 9 25957960 54501406  
H959 1 18 41459347 41460109 9 54529057 54529946  
B216 1 15 71984258 74282355 9 55648761 57407518

(21) H1067:

B268 -1 22 25864689 28696987 11 3002827 5412772  
H1067 -1 22 29331013 29340248 10 76589998 76598980  
B269 1 22 30362135 32596104 8 72342157 74778783

B266 -1 22 20049057 21700324 10 75608420 76436129  
H1067 -1 22 29331013 29340248 10 76589998 76598980  
B263 -1 21 41703939 44590131 10 76644938 78878387

## Potential hidden blocks that are isolated anchors

(1) chr1HI14864/chr7MI384+:

B4 1 1 59042296 67572651 4 92684571 101020121  
chr1HI14864/chr7MI384+ 1 1 67703811 67703930 7 8907975 8908092  
B5 -1 1 68550771 89930562 3 143216407 160561668

B257 1 19 55244810 58507181 7 3044586 6319388  
chr1HI14864/chr7MI384+ 1 1 67703811 67703930 7 8907975 8908092  
B255 -1 19 30721582 48998849 7 10994878 28800729

(2) chr1HI14864/chr7MI384-:

B4 1 1 59042296 67572651 4 92684571 101020121  
chr1HI14864/chr7MI384- -1 1 67703811 67703930 7 8907975 8908092  
B5 -1 1 68550771 89930562 3 143216407 160561668

B257 1 19 55244810 58507181 7 3044586 6319388  
chr1HI14864/chr7MI384- -1 1 67703811 67703930 7 8907975 8908092  
B255 -1 19 30721582 48998849 7 10994878 28800729

(3) chr2HI18469/chr10MI12458-:

B23 -1 2 74194189 86916548 6 72244385 84461154  
chr2HI18469/chr10MI12458- -1 2 93428310 93428389 10 59203288 59203367  
B24 -1 2 93583329 94910635 2 128084707 128642762

B27 1 2 106989746 107997641 10 58237574 59163852  
chr2HI18469/chr10MI12458- -1 2 93428310 93428389 10 59203288 59203367  
B170 -1 10 54012964 73635659 10 59308078 75301743

(4) chr2HI22918/chr1MI22845-:

B30 1 2 119901307 123756589 1 113697788 118004675  
chr2HI22918/chr1MI22845- -1 2 123788010 123788324 1 113260088 113260408  
B31 -1 2 124480451 126084332 18 31809356 32842104

B246 1 18 58183142 65698808 1 104356101 112970313  
chr2HI22918/chr1MI22845- -1 2 123788010 123788324 1 113260088 113260408  
B30 1 2 119901307 123756589 1 113697788 118004675

(5) chr2HI22920/chr1MI22846-:

B30 1 2 119901307 123756589 1 113697788 118004675  
chr2HI22920/chr1MI22846- -1 2 123873070 123873166 1 113320013 113320109  
B31 -1 2 124480451 126084332 18 31809356 32842104

B246 1 18 58183142 65698808 1 104356101 112970313  
chr2HI22920/chr1MI22846- -1 2 123873070 123873166 1 113320013 113320109  
B30 1 2 119901307 123756589 1 113697788 118004675

(6) chr2HI22923/chr1MI22847-:

B30 1 2 119901307 123756589 1 113697788 118004675  
chr2HI22923/chr1MI22847- -1 2 123994308 123994503 1 113396247 113396437  
B31 -1 2 124480451 126084332 18 31809356 32842104

B246 1 18 58183142 65698808 1 104356101 112970313  
chr2HI22923/chr1MI22847- -1 2 123994308 123994503 1 113396247 113396437  
B30 1 2 119901307 123756589 1 113697788 118004675

(7) chr3HI30084/chr3MI2356+:

B54 -1 3 126746637 144928556 9 90806074 106825155  
chr3HI30084/chr3MI2356+ 1 3 145328526 145328668 3 20292878 20293020  
B55 1 3 146018112 165098288 3 57817000 76646784

B139 1 8 63445049 66455796 3 15921269 19629727  
chr3HI30084/chr3MI2356+ 1 3 145328526 145328668 3 20292878 20293020  
B57 -1 3 167691902 175098003 3 20308062 28669246

(8) chr3HI30084/chr3MI2356-:

B54 -1 3 126746637 144928556 9 90806074 106825155  
chr3HI30084/chr3MI2356- -1 3 145328526 145328668 3 20292878 20293020  
B55 1 3 146018112 165098288 3 57817000 76646784

B139 1 8 63445049 66455796 3 15921269 19629727  
chr3HI30084/chr3MI2356- -1 3 145328526 145328668 3 20292878 20293020  
B57 -1 3 167691902 175098003 3 20308062 28669246

(9) chr3HI30087/chr3MI2355+:

B54 -1 3 126746637 144928556 9 90806074 106825155  
chr3HI30087/chr3MI2355+ 1 3 145367441 145367573 3 20102382 20102514  
B55 1 3 146018112 165098288 3 57817000 76646784

B139 1 8 63445049 66455796 3 15921269 19629727  
chr3HI30087/chr3MI2355+ 1 3 145367441 145367573 3 20102382 20102514  
B57 -1 3 167691902 175098003 3 20308062 28669246

(10) chr3HI30087/chr3MI2355-:

B54 -1 3 126746637 144928556 9 90806074 106825155  
chr3HI30087/chr3MI2355- -1 3 145367441 145367573 3 20102382 20102514  
B55 1 3 146018112 165098288 3 57817000 76646784

B139 1 8 63445049 66455796 3 15921269 19629727  
chr3HI30087/chr3MI2355- -1 3 145367441 145367573 3 20102382 20102514  
B57 -1 3 167691902 175098003 3 20308062 28669246

(11) chr3HI30094/chr3MI2354+:

B54 -1 3 126746637 144928556 9 90806074 106825155  
chr3HI30094/chr3MI2354+ 1 3 145383406 145383550 3 20091185 20091329  
B55 1 3 146018112 165098288 3 57817000 76646784

B139 1 8 63445049 66455796 3 15921269 19629727  
chr3HI30094/chr3MI2354+ 1 3 145383406 145383550 3 20091185 20091329  
B57 -1 3 167691902 175098003 3 20308062 28669246

(12) chr3HI30094/chr3MI2354-:

B54 -1 3 126746637 144928556 9 90806074 106825155  
chr3HI30094/chr3MI2354- -1 3 145383406 145383550 3 20091185 20091329  
B55 1 3 146018112 165098288 3 57817000 76646784

B139 1 8 63445049 66455796 3 15921269 19629727  
chr3HI30094/chr3MI2354- -1 3 145383406 145383550 3 20091185 20091329  
B57 -1 3 167691902 175098003 3 20308062 28669246

(13) chr3HI30096/chr3MI2353+:

B54 -1 3 126746637 144928556 9 90806074 106825155  
chr3HI30096/chr3MI2353+ 1 3 145392235 145392457 3 20074469 20074683  
B55 1 3 146018112 165098288 3 57817000 76646784

B139 1 8 63445049 66455796 3 15921269 19629727  
chr3HI30096/chr3MI2353+ 1 3 145392235 145392457 3 20074469 20074683  
B57 -1 3 167691902 175098003 3 20308062 28669246

(14) chr3HI30096/chr3MI2353-:

B54 -1 3 126746637 144928556 9 90806074 106825155  
chr3HI30096/chr3MI2353- -1 3 145392235 145392457 3 20074469 20074683  
B55 1 3 146018112 165098288 3 57817000 76646784

B139 1 8 63445049 66455796 3 15921269 19629727  
chr3HI30096/chr3MI2353- -1 3 145392235 145392457 3 20074469 20074683  
B57 -1 3 167691902 175098003 3 20308062 28669246

(15) chr3HI30103/chr13MI4727+:

B54 -1 3 126746637 144928556 9 90806074 106825155  
chr3HI30103/chr13MI4727+ 1 3 145404827 145405203 13 29848140 29848518  
B55 1 3 146018112 165098288 3 57817000 76646784

B89 -1 6 20123263 29058011 13 20566921 29761202  
chr3HI30103/chr13MI4727+ 1 3 145404827 145405203 13 29848140 29848518  
B88 1 6 166290 20118265 13 30055609 48119336

(16) chr3HI30103/chr13MI4727-:

B54 -1 3 126746637 144928556 9 90806074 106825155  
chr3HI30103/chr13MI4727- -1 3 145404827 145405203 13 29848140 29848518  
B55 1 3 146018112 165098288 3 57817000 76646784

B89 -1 6 20123263 29058011 13 20566921 29761202  
chr3HI30103/chr13MI4727- -1 3 145404827 145405203 13 29848140 29848518  
B88 1 6 166290 20118265 13 30055609 48119336

(17) chr3HI30108/chr3MI2347+:

B54 -1 3 126746637 144928556 9 90806074 106825155  
chr3HI30108/chr3MI2347+ 1 3 145427194 145427445 3 20044595 20044840  
B55 1 3 146018112 165098288 3 57817000 76646784

B139 1 8 63445049 66455796 3 15921269 19629727  
chr3HI30108/chr3MI2347+ 1 3 145427194 145427445 3 20044595 20044840  
B57 -1 3 167691902 175098003 3 20308062 28669246

(18) chr3HI30108/chr3MI2347-:

B54 -1 3 126746637 144928556 9 90806074 106825155  
chr3HI30108/chr3MI2347- -1 3 145427194 145427445 3 20044595 20044840  
B55 1 3 146018112 165098288 3 57817000 76646784

B139 1 8 63445049 66455796 3 15921269 19629727  
chr3HI30108/chr3MI2347- -1 3 145427194 145427445 3 20044595 20044840  
B57 -1 3 167691902 175098003 3 20308062 28669246

(19) chr3HI30128/chr3MI2338+:

B54 -1 3 126746637 144928556 9 90806074 106825155  
chr3HI30128/chr3MI2338+ 1 3 145512374 145512585 3 19999930 20000141  
B55 1 3 146018112 165098288 3 57817000 76646784

B139 1 8 63445049 66455796 3 15921269 19629727  
chr3HI30128/chr3MI2338+ 1 3 145512374 145512585 3 19999930 20000141  
B57 -1 3 167691902 175098003 3 20308062 28669246

(20) chr3HI30128/chr3MI2338-:

B54 -1 3 126746637 144928556 9 90806074 106825155  
chr3HI30128/chr3MI2338- -1 3 145512374 145512585 3 19999930 20000141  
B55 1 3 146018112 165098288 3 57817000 76646784

B139 1 8 63445049 66455796 3 15921269 19629727  
chr3HI30128/chr3MI2338- -1 3 145512374 145512585 3 19999930 20000141  
B57 -1 3 167691902 175098003 3 20308062 28669246

(21) chr3HI30129/chr13MI4741+:

B54 -1 3 126746637 144928556 9 90806074 106825155  
chr3HI30129/chr13MI4741+ 1 3 145512791 145513125 13 29978901 29979216  
B55 1 3 146018112 165098288 3 57817000 76646784

B89 -1 6 20123263 29058011 13 20566921 29761202  
chr3HI30129/chr13MI4741+ 1 3 145512791 145513125 13 29978901 29979216  
B88 1 6 166290 20118265 13 30055609 48119336

(22) chr3HI30129/chr13MI4741-:

B54 -1 3 126746637 144928556 9 90806074 106825155  
chr3HI30129/chr13MI4741- -1 3 145512791 145513125 13 29978901 29979216  
B55 1 3 146018112 165098288 3 57817000 76646784

B89 -1 6 20123263 29058011 13 20566921 29761202  
chr3HI30129/chr13MI4741- -1 3 145512791 145513125 13 29978901 29979216  
B88 1 6 166290 20118265 13 30055609 48119336

(23) chr3HI30138/chr13MI4742+:

B54 -1 3 126746637 144928556 9 90806074 106825155  
chr3HI30138/chr13MI4742+ 1 3 145536483 145536765 13 30001865 30002150  
B55 1 3 146018112 165098288 3 57817000 76646784

B89 -1 6 20123263 29058011 13 20566921 29761202  
chr3HI30138/chr13MI4742+ 1 3 145536483 145536765 13 30001865 30002150  
B88 1 6 166290 20118265 13 30055609 48119336

(24) chr3HI30138/chr13MI4742-:

B54 -1 3 126746637 144928556 9 90806074 106825155  
chr3HI30138/chr13MI4742- -1 3 145536483 145536765 13 30001865 30002150  
B55 1 3 146018112 165098288 3 57817000 76646784

B89 -1 6 20123263 29058011 13 20566921 29761202  
chr3HI30138/chr13MI4742- -1 3 145536483 145536765 13 30001865 30002150  
B88 1 6 166290 20118265 13 30055609 48119336



(25) chr3HI30141/chr13MI4743+:

B54 -1 3 126746637 144928556 9 90806074 106825155  
chr3HI30141/chr13MI4743+ 1 3 145546547 145546701 13 30008452 30008591  
B55 1 3 146018112 165098288 3 57817000 76646784

B89 -1 6 20123263 29058011 13 20566921 29761202  
chr3HI30141/chr13MI4743+ 1 3 145546547 145546701 13 30008452 30008591  
B88 1 6 166290 20118265 13 30055609 48119336

(26) chr3HI30141/chr13MI4743-:

B54 -1 3 126746637 144928556 9 90806074 106825155  
chr3HI30141/chr13MI4743- -1 3 145546547 145546701 13 30008452 30008591  
B55 1 3 146018112 165098288 3 57817000 76646784

B89 -1 6 20123263 29058011 13 20566921 29761202  
chr3HI30141/chr13MI4743- -1 3 145546547 145546701 13 30008452 30008591  
B88 1 6 166290 20118265 13 30055609 48119336

(27) chr3HI30213/chr3MI2261+:

B54 -1 3 126746637 144928556 9 90806074 106825155  
chr3HI30213/chr3MI2261+ 1 3 145940445 145940544 3 19703809 19703908  
B55 1 3 146018112 165098288 3 57817000 76646784

B139 1 8 63445049 66455796 3 15921269 19629727  
chr3HI30213/chr3MI2261+ 1 3 145940445 145940544 3 19703809 19703908  
B57 -1 3 167691902 175098003 3 20308062 28669246

(28) chr3HI30213/chr3MI2261-:

B54 -1 3 126746637 144928556 9 90806074 106825155  
chr3HI30213/chr3MI2261- -1 3 145940445 145940544 3 19703809 19703908  
B55 1 3 146018112 165098288 3 57817000 76646784

B139 1 8 63445049 66455796 3 15921269 19629727  
chr3HI30213/chr3MI2261- -1 3 145940445 145940544 3 19703809 19703908  
B57 -1 3 167691902 175098003 3 20308062 28669246

(29) chr3HI39375/chr16MI6178-:

B60 -1 3 191184828 193069530 16 31371477 32598395  
chr3HI39375/chr16MI6178- -1 3 193131438 193131498 16 32835201 32835261  
B61 1 3 193300446 194904324 16 30045772 31288254

B60 -1 3 191184828 193069530 16 31371477 32598395  
chr3HI39375/chr16MI6178- -1 3 193131438 193131498 16 32835201 32835261  
B52 -1 3 74208222 122080979 16 32974133 75988496

(30) chr3HI39376/chr16MI6176-:

B60 -1 3 191184828 193069530 16 31371477 32598395  
chr3HI39376/chr16MI6176- -1 3 193132721 193132830 16 32823320 32823429  
B61 1 3 193300446 194904324 16 30045772 31288254

B60 -1 3 191184828 193069530 16 31371477 32598395  
chr3HI39376/chr16MI6176- -1 3 193132721 193132830 16 32823320 32823429  
B52 -1 3 74208222 122080979 16 32974133 75988496

(31) chr3HI39393/chr16MI6177-:  
 B60 -1 3 191184828 193069530 16 31371477 32598395  
 chr3HI39393/chr16MI6177- -1 3 193223319 193223402 16 32833456 32833539  
 B61 1 3 193300446 194904324 16 30045772 31288254

B60 -1 3 191184828 193069530 16 31371477 32598395  
 chr3HI39393/chr16MI6177- -1 3 193223319 193223402 16 32833456 32833539  
 B52 -1 3 74208222 122080979 16 32974133 75988496

(32) chr3HI39394/chr16MI6179-:  
 B60 -1 3 191184828 193069530 16 31371477 32598395  
 chr3HI39394/chr16MI6179- -1 3 193229462 193229621 16 32841184 32841347  
 B61 1 3 193300446 194904324 16 30045772 31288254

B60 -1 3 191184828 193069530 16 31371477 32598395  
 chr3HI39394/chr16MI6179- -1 3 193229462 193229621 16 32841184 32841347  
 B52 -1 3 74208222 122080979 16 32974133 75988496

(33) chr6HI32244/chr1MI20956+:  
 B102 -1 6 154660191 158342015 17 3003285 6034199  
 chr6HI32244/chr1MI20956+ 1 6 158989884 158989998 1 94273968 94274083  
 B103 -1 6 159545276 166889841 17 7030643 12454308

B40 -1 2 238854551 240612329 1 92884276 94273927  
 chr6HI32244/chr1MI20956+ 1 6 158989884 158989998 1 94273968 94274083  
 B76 1 5 97767743 101536374 1 94583168 97563176

(34) chr6HI32244/chr1MI20956-:  
 B102 -1 6 154660191 158342015 17 3003285 6034199  
 chr6HI32244/chr1MI20956- -1 6 158989884 158989998 1 94273968 94274083  
 B103 -1 6 159545276 166889841 17 7030643 12454308

B40 -1 2 238854551 240612329 1 92884276 94273927  
 chr6HI32244/chr1MI20956- -1 6 158989884 158989998 1 94273968 94274083  
 B76 1 5 97767743 101536374 1 94583168 97563176

(35) chr6HI32335/chr17MI819+:  
 B102 -1 6 154660191 158342015 17 3003285 6034199  
 chr6HI32335/chr17MI819+ 1 6 159463064 159463303 17 6384013 6384255  
 B103 -1 6 159545276 166889841 17 7030643 12454308

B102 -1 6 154660191 158342015 17 3003285 6034199  
 chr6HI32335/chr17MI819+ 1 6 159463064 159463303 17 6384013 6384255  
 B103 -1 6 159545276 166889841 17 7030643 12454308

(36) chr7HI10914/chr5MI26762+:  
 B112 1 7 43555304 54768752 11 5584810 16912546  
 chr7HI10914/chr5MI26762+ 1 7 55370033 55370182 5 127973592 127973742  
 B113 -1 7 65496178 70582019 5 128791601 132651725

B197 1 12 120431830 130562871 5 120717463 127828429  
 chr7HI10914/chr5MI26762+ 1 7 55370033 55370182 5 127973592 127973742  
 B113 -1 7 65496178 70582019 5 128791601 132651725

(37) chr7HI10929/chr5MI26779+:

B112 1 7 43555304 54768752 11 5584810 16912546  
chr7HI10929/chr5MI26779+ 1 7 55587123 55587262 5 128070239 128070375  
B113 -1 7 65496178 70582019 5 128791601 132651725

B197 1 12 120431830 130562871 5 120717463 127828429  
chr7HI10929/chr5MI26779+ 1 7 55587123 55587262 5 128070239 128070375  
B113 -1 7 65496178 70582019 5 128791601 132651725

(38) chr7HI10970/chr5MI26793+:

B112 1 7 43555304 54768752 11 5584810 16912546  
chr7HI10970/chr5MI26793+ 1 7 63147707 63147878 5 128372289 128372445  
B113 -1 7 65496178 70582019 5 128791601 132651725

B197 1 12 120431830 130562871 5 120717463 127828429  
chr7HI10970/chr5MI26793+ 1 7 63147707 63147878 5 128372289 128372445  
B113 -1 7 65496178 70582019 5 128791601 132651725

(39) chr7HI10983/chr5MI26794+:

B112 1 7 43555304 54768752 11 5584810 16912546  
chr7HI10983/chr5MI26794+ 1 7 64065874 64066060 5 128413645 128413831  
B113 -1 7 65496178 70582019 5 128791601 132651725

B197 1 12 120431830 130562871 5 120717463 127828429  
chr7HI10983/chr5MI26794+ 1 7 64065874 64066060 5 128413645 128413831  
B113 -1 7 65496178 70582019 5 128791601 132651725

(40) chr7HI10994/chr5MI26804+:

B112 1 7 43555304 54768752 11 5584810 16912546  
chr7HI10994/chr5MI26804+ 1 7 64215924 64216198 5 128452151 128452404  
B113 -1 7 65496178 70582019 5 128791601 132651725

B197 1 12 120431830 130562871 5 120717463 127828429  
chr7HI10994/chr5MI26804+ 1 7 64215924 64216198 5 128452151 128452404  
B113 -1 7 65496178 70582019 5 128791601 132651725

(41) chr7HI11006/chr5MI26821+:

B112 1 7 43555304 54768752 11 5584810 16912546  
chr7HI11006/chr5MI26821+ 1 7 64574170 64574259 5 128607501 128607590  
B113 -1 7 65496178 70582019 5 128791601 132651725

B197 1 12 120431830 130562871 5 120717463 127828429  
chr7HI11006/chr5MI26821+ 1 7 64574170 64574259 5 128607501 128607590  
B113 -1 7 65496178 70582019 5 128791601 132651725

(42) chr7HI11010/chr5MI26819+:

B112 1 7 43555304 54768752 11 5584810 16912546  
chr7HI11010/chr5MI26819+ 1 7 64747862 64748028 5 128581937 128582100  
B113 -1 7 65496178 70582019 5 128791601 132651725

B197 1 12 120431830 130562871 5 120717463 127828429  
chr7HI11010/chr5MI26819+ 1 7 64747862 64748028 5 128581937 128582100  
B113 -1 7 65496178 70582019 5 128791601 132651725

(43) chr7HI11012/chr5MI26820+:  
B112 1 7 43555304 54768752 11 5584810 16912546  
chr7HI11012/chr5MI26820+ 1 7 64852517 64853039 5 128604040 128604555  
B113 -1 7 65496178 70582019 5 128791601 132651725  
  
B197 1 12 120431830 130562871 5 120717463 127828429  
chr7HI11012/chr5MI26820+ 1 7 64852517 64853039 5 128604040 128604555  
B113 -1 7 65496178 70582019 5 128791601 132651725

(44) chr7HI11022/chr5MI26831+:  
B112 1 7 43555304 54768752 11 5584810 16912546  
chr7HI11022/chr5MI26831+ 1 7 65129851 65130026 5 128701439 128701614  
B113 -1 7 65496178 70582019 5 128791601 132651725  
  
B197 1 12 120431830 130562871 5 120717463 127828429  
chr7HI11022/chr5MI26831+ 1 7 65129851 65130026 5 128701439 128701614  
B113 -1 7 65496178 70582019 5 128791601 132651725

(45) chr7HI11023/chr5MI26834+:  
B112 1 7 43555304 54768752 11 5584810 16912546  
chr7HI11023/chr5MI26834+ 1 7 65270186 65270401 5 128739221 128739427  
B113 -1 7 65496178 70582019 5 128791601 132651725  
  
B197 1 12 120431830 130562871 5 120717463 127828429  
chr7HI11023/chr5MI26834+ 1 7 65270186 65270401 5 128739221 128739427  
B113 -1 7 65496178 70582019 5 128791601 132651725

(46) chr7HI12347/chr5MI28163+:  
B114 -1 7 71370997 73342666 5 132740372 133969586  
chr7HI12347/chr5MI28163+ 1 7 73978166 73978345 5 134175462 134175637  
B115 -1 7 75349329 83808903 5 10906478 19817355  
  
B114 -1 7 71370997 73342666 5 132740372 133969586  
chr7HI12347/chr5MI28163+ 1 7 73978166 73978345 5 134175462 134175637  
B119 -1 7 98062835 100597327 5 134738623 137051964

(47) chr7HI12354/chr5MI28170+:  
B114 -1 7 71370997 73342666 5 132740372 133969586  
chr7HI12354/chr5MI28170+ 1 7 74079907 74080022 5 134291975 134292089  
B115 -1 7 75349329 83808903 5 10906478 19817355  
  
B114 -1 7 71370997 73342666 5 132740372 133969586  
chr7HI12354/chr5MI28170+ 1 7 74079907 74080022 5 134291975 134292089  
B119 -1 7 98062835 100597327 5 134738623 137051964

(48) chr7HI12414/chr5MI28230+:  
B114 -1 7 71370997 73342666 5 132740372 133969586  
chr7HI12414/chr5MI28230+ 1 7 74449347 74449436 5 134476059 134476148  
B115 -1 7 75349329 83808903 5 10906478 19817355  
  
B114 -1 7 71370997 73342666 5 132740372 133969586  
chr7HI12414/chr5MI28230+ 1 7 74449347 74449436 5 134476059 134476148  
B119 -1 7 98062835 100597327 5 134738623 137051964

(49) chr7HI12415/chr5MI28228+:  
 B114 -1 7 71370997 73342666 5 132740372 133969586  
 chr7HI12415/chr5MI28228+ 1 7 74449554 74449808 5 134473518 134473785  
 B115 -1 7 75349329 83808903 5 10906478 19817355

B114 -1 7 71370997 73342666 5 132740372 133969586  
 chr7HI12415/chr5MI28228+ 1 7 74449554 74449808 5 134473518 134473785  
 B119 -1 7 98062835 100597327 5 134738623 137051964

(50) chr8HI720/chr14MI12178+:  
 B126 1 8 297461 7385340 8 13927047 20676019  
 chr8HI720/chr14MI12178+ 1 8 7441498 7441617 14 54081946 54082063  
 B127 -1 8 8032078 9556982 8 33750059 35127206

B203 1 13 48224187 50354776 14 52423915 54060401  
 chr8HI720/chr14MI12178+ 1 8 7441498 7441617 14 54081946 54082063  
 B128 -1 8 9574409 11804604 14 54178729 55725318

(51) chr8HI15875/chr13MI12260+:  
 B142 -1 8 85653020 96246458 4 9258417 19488529  
 chr8HI15875/chr13MI12260+ 1 8 96246898 96246981 13 64379608 64379691  
 B143 1 8 96459282 143732083 15 32888006 77422816

B152 1 9 88158123 90472665 13 61669473 63179589  
 chr8HI15875/chr13MI12260+ 1 8 96246898 96246981 13 64379608 64379691  
 B72 -1 5 232166 8088502 13 65619862 71445385

(52) chr9HI8298/chr13MI12205+:  
 B146 1 9 27637433 38782166 4 34605534 44701744  
 chr9HI8298/chr13MI12205+ 1 9 38964621 38965219 13 63279912 63280472  
 B147 -1 9 62064465 73833427 19 13594243 24464344

B152 1 9 88158123 90472665 13 61669473 63179589  
 chr9HI8298/chr13MI12205+ 1 9 38964621 38965219 13 63279912 63280472  
 B72 -1 5 232166 8088502 13 65619862 71445385

(53) chr9HI8318/chr13MI12248+:  
 B146 1 9 27637433 38782166 4 34605534 44701744  
 chr9HI8318/chr13MI12248+ 1 9 45490278 45490467 13 63798552 63798736  
 B147 -1 9 62064465 73833427 19 13594243 24464344

B152 1 9 88158123 90472665 13 61669473 63179589  
 chr9HI8318/chr13MI12248+ 1 9 45490278 45490467 13 63798552 63798736  
 B72 -1 5 232166 8088502 13 65619862 71445385

(54) chr9HI8323/chr13MI12246+:  
 B146 1 9 27637433 38782166 4 34605534 44701744  
 chr9HI8323/chr13MI12246+ 1 9 46250110 46250385 13 63787830 63788075  
 B147 -1 9 62064465 73833427 19 13594243 24464344

B152 1 9 88158123 90472665 13 61669473 63179589  
 chr9HI8323/chr13MI12246+ 1 9 46250110 46250385 13 63787830 63788075  
 B72 -1 5 232166 8088502 13 65619862 71445385

(55) chr9HI8324/chr13MI12245+:

B146 1 9 27637433 38782166 4 34605534 44701744  
chr9HI8324/chr13MI12245+ 1 9 46413813 46413982 13 63721334 63721509  
B147 -1 9 62064465 73833427 19 13594243 24464344

B152 1 9 88158123 90472665 13 61669473 63179589  
chr9HI8324/chr13MI12245+ 1 9 46413813 46413982 13 63721334 63721509  
B72 -1 5 232166 8088502 13 65619862 71445385

(56) chr9HI8325/chr13MI12242+:

B146 1 9 27637433 38782166 4 34605534 44701744  
chr9HI8325/chr13MI12242+ 1 9 46491828 46491938 13 63665731 63665841  
B147 -1 9 62064465 73833427 19 13594243 24464344

B152 1 9 88158123 90472665 13 61669473 63179589  
chr9HI8325/chr13MI12242+ 1 9 46491828 46491938 13 63665731 63665841  
B72 -1 5 232166 8088502 13 65619862 71445385

(57) chr9HI8328/chr13MI12237+:

B146 1 9 27637433 38782166 4 34605534 44701744  
chr9HI8328/chr13MI12237+ 1 9 46827636 46827728 13 63580960 63581052  
B147 -1 9 62064465 73833427 19 13594243 24464344

B152 1 9 88158123 90472665 13 61669473 63179589  
chr9HI8328/chr13MI12237+ 1 9 46827636 46827728 13 63580960 63581052  
B72 -1 5 232166 8088502 13 65619862 71445385

(58) chr9HI8340/chr13MI12225+:

B146 1 9 27637433 38782166 4 34605534 44701744  
chr9HI8340/chr13MI12225+ 1 9 47516239 47516314 13 63400488 63400563  
B147 -1 9 62064465 73833427 19 13594243 24464344

B152 1 9 88158123 90472665 13 61669473 63179589  
chr9HI8340/chr13MI12225+ 1 9 47516239 47516314 13 63400488 63400563  
B72 -1 5 232166 8088502 13 65619862 71445385

(59) chr11HI357/chr7MI24896+:

B175 -1 11 371944 1812080 7 132256401 133113643  
chr11HI357/chr7MI24896+ 1 11 3584785 3584902 7 134221163 134221280  
B176 1 11 4160230 18439115 7 91904633 106151720

B175 -1 11 371944 1812080 7 132256401 133113643  
chr11HI357/chr7MI24896+ 1 11 3584785 3584902 7 134221163 134221280  
B183 -1 11 71300640 73541758 7 134240159 135758348

(60) chr11HI358/chr7MI24898+:

B175 -1 11 371944 1812080 7 132256401 133113643  
chr11HI358/chr7MI24898+ 1 11 3590786 3591070 7 134226661 134226947  
B176 1 11 4160230 18439115 7 91904633 106151720

B175 -1 11 371944 1812080 7 132256401 133113643  
chr11HI358/chr7MI24898+ 1 11 3590786 3591070 7 134226661 134226947  
B183 -1 11 71300640 73541758 7 134240159 135758348

(61) chr11HI360/chr7MI24897+:  
 B175 -1 11 371944 1812080 7 132256401 133113643  
 chr11HI360/chr7MI24897+ 1 11 3638158 3638423 7 134223123 134223394  
 B176 1 11 4160230 18439115 7 91904633 106151720

B175 -1 11 371944 1812080 7 132256401 133113643  
 chr11HI360/chr7MI24897+ 1 11 3638158 3638423 7 134223123 134223394  
 B183 -1 11 71300640 73541758 7 134240159 135758348

(62) chr11HI19279/chr8MI14047+:  
 B185 -1 11 92192136 109629127 9 3257414 18376264  
 chr11HI19279/chr8MI14047+ 1 11 109642659 109642802 8 74786558 74786700  
 B186 -1 11 109647080 137397151 9 25957960 54501406

B269 1 22 30362135 32596104 8 72342157 74778783  
 chr11HI19279/chr8MI14047+ 1 11 109642659 109642802 8 74786558 74786700  
 B69 -1 4 142109321 151684203 8 74840942 83153812

(63) chr11HI19279/chr8MI14047-:  
 B185 -1 11 92192136 109629127 9 3257414 18376264  
 chr11HI19279/chr8MI14047- -1 11 109642659 109642802 8 74786558 74786700  
 B186 -1 11 109647080 137397151 9 25957960 54501406

B269 1 22 30362135 32596104 8 72342157 74778783  
 chr11HI19279/chr8MI14047- -1 11 109642659 109642802 8 74786558 74786700  
 B69 -1 4 142109321 151684203 8 74840942 83153812

(64) chr13HI5778/chr8MI2917+:  
 B203 1 13 48224187 50354776 14 52423915 54060401  
 chr13HI5778/chr8MI2917+ 1 13 50436164 50436333 8 20699027 20699189  
 B204 1 13 51194296 101505368 14 70539080 116001472

B126 1 8 297461 7385340 8 13927047 20676019  
 chr13HI5778/chr8MI2917+ 1 13 50436164 50436333 8 20699027 20699189  
 B134 -1 8 37468035 41896742 8 21166936 24571771

(65) chr13HI5855/chr8MI2994+:  
 B203 1 13 48224187 50354776 14 52423915 54060401  
 chr13HI5855/chr8MI2994+ 1 13 51022276 51022413 8 20994327 20994472  
 B204 1 13 51194296 101505368 14 70539080 116001472

B126 1 8 297461 7385340 8 13927047 20676019  
 chr13HI5855/chr8MI2994+ 1 13 51022276 51022413 8 20994327 20994472  
 B134 -1 8 37468035 41896742 8 21166936 24571771

(66) chr15HI1222/chr7MI6604-:  
 B213 -1 15 28154602 29941847 2 113175622 114776461  
 chr15HI1222/chr7MI6604- -1 15 30221899 30222112 7 53916088 53916288  
 B214 1 15 30283818 46855367 2 114843098 128049851

B212 1 15 26522378 27825905 7 52481896 53745919  
 chr15HI1222/chr7MI6604- -1 15 30221899 30222112 7 53916088 53916288  
 B211 1 15 24758877 25909266 7 53990869 55045944

(67) chr15HI13206/chr7MI10920-:

B219 1 15 79014608 80632267 7 70854910 72326056  
chr15HI13206/chr7MI10920- -1 15 81394898 81395062 7 70524595 70524772  
B220 1 15 81971868 87927149 7 64852001 70357616

B220 1 15 81971868 87927149 7 64852001 70357616  
chr15HI13206/chr7MI10920- -1 15 81394898 81395062 7 70524595 70524772  
B219 1 15 79014608 80632267 7 70854910 72326056

(68) chr16HI5760/chr6MI13529-:

B224 1 16 16510398 30601232 7 106321383 118165833  
chr16HI5760/chr6MI13529- -1 16 30945768 30946057 6 57383354 57383639  
B225 1 16 37104394 60677388 8 84966092 107402587

B109 1 7 22898169 32723118 6 49363444 57308117  
chr16HI5760/chr6MI13529- -1 16 30945768 30946057 6 57383354 57383639  
B65 1 4 89180085 95649989 6 59055799 65685290

(69) chr16HI5766/chr7MI415+:

B224 1 16 16510398 30601232 7 106321383 118165833  
chr16HI5766/chr7MI415+ 1 16 32408948 32409031 7 9211522 9211605  
B225 1 16 37104394 60677388 8 84966092 107402587

B257 1 19 55244810 58507181 7 3044586 6319388  
chr16HI5766/chr7MI415+ 1 16 32408948 32409031 7 9211522 9211605  
B255 -1 19 30721582 48998849 7 10994878 28800729

(70) chr16HI5766/chr7MI415-:

B224 1 16 16510398 30601232 7 106321383 118165833  
chr16HI5766/chr7MI415- -1 16 32408948 32409031 7 9211522 9211605  
B225 1 16 37104394 60677388 8 84966092 107402587

B257 1 19 55244810 58507181 7 3044586 6319388  
chr16HI5766/chr7MI415- -1 16 32408948 32409031 7 9211522 9211605  
B255 -1 19 30721582 48998849 7 10994878 28800729

(71) chr16HI5775/chr7MI409+:

B224 1 16 16510398 30601232 7 106321383 118165833  
chr16HI5775/chr7MI409+ 1 16 36552286 36552391 7 9151922 9152027  
B225 1 16 37104394 60677388 8 84966092 107402587

B257 1 19 55244810 58507181 7 3044586 6319388  
chr16HI5775/chr7MI409+ 1 16 36552286 36552391 7 9151922 9152027  
B255 -1 19 30721582 48998849 7 10994878 28800729

(72) chr16HI5775/chr7MI409-:

B224 1 16 16510398 30601232 7 106321383 118165833  
chr16HI5775/chr7MI409- -1 16 36552286 36552391 7 9151922 9152027  
B225 1 16 37104394 60677388 8 84966092 107402587

B257 1 19 55244810 58507181 7 3044586 6319388  
chr16HI5775/chr7MI409- -1 16 36552286 36552391 7 9151922 9152027  
B255 -1 19 30721582 48998849 7 10994878 28800729



(73) chr16HI5776/chr6MI13596-:  
 B224 1 16 16510398 30601232 7 106321383 118165833  
 chr16HI5776/chr6MI13596- -1 16 36590761 36590828 6 58565300 58565367  
 B225 1 16 37104394 60677388 8 84966092 107402587

B109 1 7 22898169 32723118 6 49363444 57308117  
 chr16HI5776/chr6MI13596- -1 16 36590761 36590828 6 58565300 58565367  
 B65 1 4 89180085 95649989 6 59055799 65685290

(74) chr16HI5783/chr16MI2395+:  
 B224 1 16 16510398 30601232 7 106321383 118165833  
 chr16HI5783/chr16MI2395+ 1 16 36948465 36948546 16 14103421 14103501  
 B225 1 16 37104394 60677388 8 84966092 107402587

B223 1 16 3315019 16052869 16 3157694 13950902  
 chr16HI5783/chr16MI2395+ 1 16 36948465 36948546 16 14103421 14103501  
 B135 -1 8 47438619 48888993 16 14138531 15608082

(75) chr16HI5783/chr16MI2395-:  
 B224 1 16 16510398 30601232 7 106321383 118165833  
 chr16HI5783/chr16MI2395- -1 16 36948465 36948546 16 14103421 14103501  
 B225 1 16 37104394 60677388 8 84966092 107402587

B223 1 16 3315019 16052869 16 3157694 13950902  
 chr16HI5783/chr16MI2395- -1 16 36948465 36948546 16 14103421 14103501  
 B135 -1 8 47438619 48888993 16 14138531 15608082

(76) chr17HI4181/chr6MI25637+:  
 B231 1 17 17258267 20380049 11 60197321 62644618  
 chr17HI4181/chr6MI25637+ 1 17 20424845 20424949 6 119323079 119323183  
 B232 -1 17 25413494 28606967 11 77360300 79941136

B167 -1 10 42582827 45461049 6 117063610 119191868  
 chr17HI4181/chr6MI25637+ 1 17 20424845 20424949 6 119323079 119323183  
 B187 -1 12 47544 2629892 6 119423515 122264710

(77) chr17HI4181/chr6MI25637-:  
 B231 1 17 17258267 20380049 11 60197321 62644618  
 chr17HI4181/chr6MI25637- -1 17 20424845 20424949 6 119323079 119323183  
 B232 -1 17 25413494 28606967 11 77360300 79941136

B167 -1 10 42582827 45461049 6 117063610 119191868  
 chr17HI4181/chr6MI25637- -1 17 20424845 20424949 6 119323079 119323183  
 B187 -1 12 47544 2629892 6 119423515 122264710

(78) chr19HI1472/chr17MI5224+:  
 B250 1 19 7221494 8277183 8 3050238 4438387  
 chr19HI1472/chr17MI5224+ 1 19 8689138 8689227 17 32641110 32641196  
 B251 1 19 10042462 11820093 9 20698640 22209084

B262 1 21 40038764 41625800 17 30171030 31278245  
 chr19HI1472/chr17MI5224+ 1 19 8689138 8689227 17 32641110 32641196  
 B90 -1 6 29575435 33309207 17 33016801 36305724

(79) chr19HI1472/chr17MI5224-:

B250 1 19 7221494 8277183 8 3050238 4438387  
chr19HI1472/chr17MI5224- -1 19 8689138 8689227 17 32641110 32641196  
B251 1 19 10042462 11820093 9 20698640 22209084

B262 1 21 40038764 41625800 17 30171030 31278245  
chr19HI1472/chr17MI5224- -1 19 8689138 8689227 17 32641110 32641196  
B90 -1 6 29575435 33309207 17 33016801 36305724

(80) chr19HI1480/chr17MI5262+:

B250 1 19 7221494 8277183 8 3050238 4438387  
chr19HI1480/chr17MI5262+ 1 19 8731925 8732602 17 32797682 32798358  
B251 1 19 10042462 11820093 9 20698640 22209084

B262 1 21 40038764 41625800 17 30171030 31278245  
chr19HI1480/chr17MI5262+ 1 19 8731925 8732602 17 32797682 32798358  
B90 -1 6 29575435 33309207 17 33016801 36305724

(81) chr19HI1480/chr17MI5262-:

B250 1 19 7221494 8277183 8 3050238 4438387  
chr19HI1480/chr17MI5262- -1 19 8731925 8732602 17 32797682 32798358  
B251 1 19 10042462 11820093 9 20698640 22209084

B262 1 21 40038764 41625800 17 30171030 31278245  
chr19HI1480/chr17MI5262- -1 19 8731925 8732602 17 32797682 32798358  
B90 -1 6 29575435 33309207 17 33016801 36305724

(82) chr19HI1497/chr17MI5247+:

B250 1 19 7221494 8277183 8 3050238 4438387  
chr19HI1497/chr17MI5247+ 1 19 8780249 8780323 17 32755054 32755128  
B251 1 19 10042462 11820093 9 20698640 22209084

B262 1 21 40038764 41625800 17 30171030 31278245  
chr19HI1497/chr17MI5247+ 1 19 8780249 8780323 17 32755054 32755128  
B90 -1 6 29575435 33309207 17 33016801 36305724

(83) chr19HI1497/chr17MI5247-:

B250 1 19 7221494 8277183 8 3050238 4438387  
chr19HI1497/chr17MI5247- -1 19 8780249 8780323 17 32755054 32755128  
B251 1 19 10042462 11820093 9 20698640 22209084

B262 1 21 40038764 41625800 17 30171030 31278245  
chr19HI1497/chr17MI5247- -1 19 8780249 8780323 17 32755054 32755128  
B90 -1 6 29575435 33309207 17 33016801 36305724

(84) chr19HI1510/chr7MI412+:

B250 1 19 7221494 8277183 8 3050238 4438387  
chr19HI1510/chr7MI412+ 1 19 8935548 8935919 7 9160042 9160412  
B251 1 19 10042462 11820093 9 20698640 22209084

B257 1 19 55244810 58507181 7 3044586 6319388  
chr19HI1510/chr7MI412+ 1 19 8935548 8935919 7 9160042 9160412  
B255 -1 19 30721582 48998849 7 10994878 28800729

(85) chr19HI1510/chr7MI412-:

B250 1 19 7221494 8277183 8 3050238 4438387  
chr19HI1510/chr7MI412- -1 19 8935548 8935919 7 9160042 9160412  
B251 1 19 10042462 11820093 9 20698640 22209084

B257 1 19 55244810 58507181 7 3044586 6319388  
chr19HI1510/chr7MI412- -1 19 8935548 8935919 7 9160042 9160412  
B255 -1 19 30721582 48998849 7 10994878 28800729

(86) chr19HI2015/chr17MI5208+:

B251 1 19 10042462 11820093 9 20698640 22209084  
chr19HI2015/chr17MI5208+ 1 19 12608329 12608474 17 32224517 32224662  
B252 -1 19 12888823 15027656 8 83263813 84801237

B262 1 21 40038764 41625800 17 30171030 31278245  
chr19HI2015/chr17MI5208+ 1 19 12608329 12608474 17 32224517 32224662  
B90 -1 6 29575435 33309207 17 33016801 36305724

(87) chr19HI2015/chr17MI5208-:

B251 1 19 10042462 11820093 9 20698640 22209084  
chr19HI2015/chr17MI5208- -1 19 12608329 12608474 17 32224517 32224662  
B252 -1 19 12888823 15027656 8 83263813 84801237

B262 1 21 40038764 41625800 17 30171030 31278245  
chr19HI2015/chr17MI5208- -1 19 12608329 12608474 17 32224517 32224662  
B90 -1 6 29575435 33309207 17 33016801 36305724

(88) chr19HI2461/chr16MI2641+:

B252 -1 19 12888823 15027656 8 83263813 84801237  
chr19HI2461/chr16MI2641+ 1 19 15418586 15418750 16 16140736 16140897  
B253 -1 19 17680030 20268144 8 69189072 71105965

B135 -1 8 47438619 48888993 16 14138531 15608082  
chr19HI2461/chr16MI2641+ 1 19 15418586 15418750 16 16140736 16140897  
B265 -1 22 16258382 19028891 16 16348074 18445424

(89) chr22HI2420/chr10MI16087-:

B268 -1 22 25864689 28696987 11 3002827 5412772  
chr22HI2420/chr10MI16087- -1 22 29202147 29202247 10 76625645 76625745  
B269 1 22 30362135 32596104 8 72342157 74778783

B266 -1 22 20049057 21700324 10 75608420 76436129  
chr22HI2420/chr10MI16087- -1 22 29202147 29202247 10 76625645 76625745  
B263 -1 21 41703939 44590131 10 76644938 78878387

(90) chrXHI10219/chrXMI3236-:

B276 -1 X 50043614 52060063 X 127515295 129338565  
chrXHI10219/chrXMI3236- -1 X 52103660 52104007 X 18396337 18396687  
B277 1 X 52452334 53848687 X 129944210 130870771

B273 1 X 35727410 46666299 X 6492463 18249797  
chrXHI10219/chrXMI3236- -1 X 52103660 52104007 X 18396337 18396687  
B281 1 X 110065695 148681251 X 18632704 58648190

# Potential hidden blocks that are ensembl orthologous gene pairs

- (1) [ENSG00000170893/ENSMUSG00000005892](#):  
B53 -1 3 122498736 125870910 6 88567410 91394019  
ENSG00000170893/ENSMUSG00000005892 -1 3 126462647 126465864 6 93021891  
93024475  
B54 -1 3 126746637 144928556 9 90806074 106825155  
  
B42 1 3 12870112 15068439 6 91409248 92992110  
ENSG00000170893/ENSMUSG00000005892 -1 3 126462647 126465864 6 93021891  
93024475  
B51 1 3 62881937 73671271 6 93068825 104101354
- (2) [ENSG00000144891/ENSMUSG00000027625](#):  
B54 -1 3 126746637 144928556 9 90806074 106825155  
ENSG00000144891/ENSMUSG00000027625 1 3 145407989 145409065 3 20052677  
20053753  
B55 1 3 146018112 165098288 3 57817000 76646784  
  
B139 1 8 63445049 66455796 3 15921269 19629727  
ENSG00000144891/ENSMUSG00000027625 1 3 145407989 145409065 3 20052677  
20053753  
B57 -1 3 167691902 175098003 3 20308062 28669246
- (3) [ENSG00000153002/ENSMUSG00000011463](#):  
B54 -1 3 126746637 144928556 9 90806074 106825155  
ENSG00000153002/ENSMUSG00000011463 1 3 145494773 145527140 3 20000002  
20013176  
B55 1 3 146018112 165098288 3 57817000 76646784  
  
B139 1 8 63445049 66455796 3 15921269 19629727  
ENSG00000153002/ENSMUSG00000011463 1 3 145494773 145527140 3 20000002  
20013176  
B57 -1 3 167691902 175098003 3 20308062 28669246
- (4) [ENSG00000163751/ENSMUSG0000001865](#):  
B54 -1 3 126746637 144928556 9 90806074 106825155  
ENSG00000163751/ENSMUSG0000001865 1 3 145532247 145564040 3 19954271  
19980823  
B55 1 3 146018112 165098288 3 57817000 76646784  
  
B139 1 8 63445049 66455796 3 15921269 19629727  
ENSG00000163751/ENSMUSG0000001865 1 3 145532247 145564040 3 19954271  
19980823  
B57 -1 3 167691902 175098003 3 20308062 28669246

- (5) [ENSG00000163754/ENSMUSG00000019528](#):  
B54 -1 3 126746637 144928556 9 90806074 106825155  
ENSG00000163754/ENSMUSG00000019528 1 3 145658541 145694585 3 19860730  
19893696  
B55 1 3 146018112 165098288 3 57817000 76646784  
  
B139 1 8 63445049 66455796 3 15921269 19629727  
ENSG00000163754/ENSMUSG00000019528 1 3 145658541 145694585 3 19860730  
19893696  
B57 -1 3 167691902 175098003 3 20308062 28669246
- (6) [ENSG00000071794/ENSMUSG00000002428](#):  
B54 -1 3 126746637 144928556 9 90806074 106825155  
ENSG00000071794/ENSMUSG00000002428 -1 3 145697080 145753483 3 19795873  
19856980  
B55 1 3 146018112 165098288 3 57817000 76646784  
  
B139 1 8 63445049 66455796 3 15921269 19629727  
ENSG00000071794/ENSMUSG00000002428 -1 3 145697080 145753483 3 19795873  
19856980  
B57 -1 3 167691902 175098003 3 20308062 28669246
- (7) [ENSG00000163755/ENSMUSG00000027615](#):  
B54 -1 3 126746637 144928556 9 90806074 106825155  
ENSG00000163755/ENSMUSG00000027615 1 3 145796660 145839908 3 19734096  
19773328  
B55 1 3 146018112 165098288 3 57817000 76646784  
  
B139 1 8 63445049 66455796 3 15921269 19629727  
ENSG00000163755/ENSMUSG00000027615 1 3 145796660 145839908 3 19734096  
19773328  
B57 -1 3 167691902 175098003 3 20308062 28669246
- (8) [ENSG00000047457/ENSMUSG00000003617](#):  
B54 -1 3 126746637 144928556 9 90806074 106825155  
ENSG00000047457/ENSMUSG00000003617 -1 3 145840536 145888737 3 19694526  
19746466  
B55 1 3 146018112 165098288 3 57817000 76646784  
  
B139 1 8 63445049 66455796 3 15921269 19629727  
ENSG00000047457/ENSMUSG00000003617 -1 3 145840536 145888737 3 19694526  
19746466  
B57 -1 3 167691902 175098003 3 20308062 28669246
- (9) [ENSG00000163756/ENSMUSG00000003617](#):  
B54 -1 3 126746637 144928556 9 90806074 106825155  
ENSG00000163756/ENSMUSG00000003617 -1 3 145897684 145942555 3 19694526  
19746466  
B55 1 3 146018112 165098288 3 57817000 76646784  
  
B139 1 8 63445049 66455796 3 15921269 19629727  
ENSG00000163756/ENSMUSG00000003617 -1 3 145897684 145942555 3 19694526  
19746466  
B57 -1 3 167691902 175098003 3 20308062 28669246

(10) [ENSG00000114473/ENSMUSG00000035578](#):  
B60 -1 3 191184828 193069530 16 31371477 32598395  
ENSG00000114473/ENSMUSG00000035578 -1 3 193194816 193229590 16 32804280  
32837886  
B61 1 3 193300446 194904324 16 30045772 31288254  
  
B60 -1 3 191184828 193069530 16 31371477 32598395  
ENSG00000114473/ENSMUSG00000035578 -1 3 193194816 193229590 16 32804280  
32837886  
B52 -1 3 74208222 122080979 16 32974133 75988496

(11) [ENSG00000164209/ENSMUSG00000024259](#):  
B77 1 5 102421477 109680107 17 57945510 64651523  
ENSG00000164209/ENSMUSG00000024259 1 5 109697926 109721656 18 31756372  
31784687  
B78 1 5 109922486 111890773 18 32887608 34577096  
  
B243 1 18 18405876 41210522 18 9944677 31718535  
ENSG00000164209/ENSMUSG00000024259 1 5 109697926 109721656 18 31756372  
31784687  
B31 -1 2 124480451 126084332 18 31809356 32842104

(12) [ENSG00000159279/ENSMUSG00000038071](#):  
B81 1 5 133724901 136965714 13 55110588 57638659  
ENSG00000159279/ENSMUSG00000038071 1 5 137018935 137019804 18 44451878  
44452993  
B82 1 5 137101134 147649159 18 34587903 44275299  
  
B82 1 5 137101134 147649159 18 34587903 44275299  
ENSG00000159279/ENSMUSG00000038071 1 5 137018935 137019804 18 44451878  
44452993  
B79 1 5 111908709 129884865 18 44557280 60465570

(13) [ENSG00000120729/ENSMUSG00000024471](#):  
B81 1 5 133724901 136965714 13 55110588 57638659  
ENSG00000120729/ENSMUSG00000024471 1 5 137078595 137098575 18 44510639  
44532291  
B82 1 5 137101134 147649159 18 34587903 44275299  
  
B82 1 5 137101134 147649159 18 34587903 44275299  
ENSG00000120729/ENSMUSG00000024471 1 5 137078595 137098575 18 44510639  
44532291  
B79 1 5 111908709 129884865 18 44557280 60465570

(14) [ENSG00000175021/ENSMUSG00000033516](#):  
B102 -1 6 154660191 158342015 17 3003285 6034199  
ENSG00000175021/ENSMUSG00000033516 1 6 159030024 159075562 17 6658988  
6697182  
B103 -1 6 159545276 166889841 17 7030643 12454308  
  
B102 -1 6 154660191 158342015 17 3003285 6034199  
ENSG00000175021/ENSMUSG00000033516 1 6 159030024 159075562 17 6658988  
6697182  
B103 -1 6 159545276 166889841 17 7030643 12454308

(15) [ENSG00000164694/ENSMUSG00000023857](#):  
B102 -1 6 154660191 158342015 17 3003285 6034199  
ENSG00000164694/ENSMUSG00000023857 1 6 159090396 159132534 17 6641961  
6645925  
B103 -1 6 159545276 166889841 17 7030643 12454308  
  
B102 -1 6 154660191 158342015 17 3003285 6034199  
ENSG00000164694/ENSMUSG00000023857 1 6 159090396 159132534 17 6641961  
6645925  
B103 -1 6 159545276 166889841 17 7030643 12454308

(16) [ENSG00000136244/ENSMUSG00000025746](#):  
B108 -1 7 19397991 22170784 12 111604389 114250780  
ENSG00000136244/ENSMUSG00000025746 1 7 22409302 22414098 5 28513482  
28520288  
B109 1 7 22898169 32723118 6 49363444 57308117  
  
B124 1 7 148804843 155395463 5 22707921 28257720  
ENSG00000136244/ENSMUSG00000025746 1 7 22409302 22414098 5 28513482  
28520288  
B18 1 2 26317413 28924420 5 28612308 31149741

(17) [ENSG00000122550/ENSMUSG00000028986](#):  
B108 -1 7 19397991 22170784 12 111604389 114250780  
ENSG00000122550/ENSMUSG00000028986 1 7 22787884 22857403 5 22558587  
22617493  
B109 1 7 22898169 32723118 6 49363444 57308117  
  
B120 1 7 100871379 103679611 5 19857400 22263918  
ENSG00000122550/ENSMUSG00000028986 1 7 22787884 22857403 5 22558587  
22617493  
B124 1 7 148804843 155395463 5 22707921 28257720

(18) [ENSG00000136243/ENSMUSG00000038345](#):  
B108 -1 7 19397991 22170784 12 111604389 114250780  
ENSG00000136243/ENSMUSG00000038345 1 7 22863968 22883107 5 22622804  
22640589  
B109 1 7 22898169 32723118 6 49363444 57308117  
  
B120 1 7 100871379 103679611 5 19857400 22263918  
ENSG00000136243/ENSMUSG00000038345 1 7 22863968 22883107 5 22622804  
22640589  
B124 1 7 148804843 155395463 5 22707921 28257720

(19) [ENSG00000154999/ENSMUSG00000034211](#):  
B112 1 7 43555304 54768752 11 5584810 16912546  
ENSG00000154999/ENSMUSG00000034211 1 7 55483645 55488263 5 127995144  
127998153  
B113 -1 7 65496178 70582019 5 128791601 132651725  
  
B197 1 12 120431830 130562871 5 120717463 127828429  
ENSG00000154999/ENSMUSG00000034211 1 7 55483645 55488263 5 127995144  
127998153  
B113 -1 7 65496178 70582019 5 128791601 132651725

(20) [ENSG00000146729/ENSMUSG00000029432](#):  
B112 1 7 43555304 54768752 11 5584810 16912546  
ENSG00000146729/ENSMUSG00000029432 1 7 55496366 55531942 5 128004561  
128038241

B113 -1 7 65496178 70582019 5 128791601 132651725

B197 1 12 120431830 130562871 5 120717463 127828429  
ENSG00000146729/ENSMUSG00000029432 1 7 55496366 55531942 5 128004561  
128038241

B113 -1 7 65496178 70582019 5 128791601 132651725

(21) [ENSG00000146731/ENSMUSG00000029447](#):  
B112 1 7 43555304 54768752 11 5584810 16912546  
ENSG00000146731/ENSMUSG00000029447 1 7 55583477 55595752 5 128068144  
128075206

B113 -1 7 65496178 70582019 5 128791601 132651725

B197 1 12 120431830 130562871 5 120717463 127828429  
ENSG00000146731/ENSMUSG00000029447 1 7 55583477 55595752 5 128068144  
128075206

B113 -1 7 65496178 70582019 5 128791601 132651725

(22) [ENSG00000129103/ENSMUSG00000025538](#):  
B112 1 7 43555304 54768752 11 5584810 16912546  
ENSG00000129103/ENSMUSG00000025538 1 7 55596071 55612433 5 128276795  
128287017

B113 -1 7 65496178 70582019 5 128791601 132651725

B197 1 12 120431830 130562871 5 120717463 127828429  
ENSG00000129103/ENSMUSG00000025538 1 7 55596071 55612433 5 128276795  
128287017

B113 -1 7 65496178 70582019 5 128791601 132651725

(23) [ENSG00000174890/ENSMUSG00000034228](#):  
B112 1 7 43555304 54768752 11 5584810 16912546  
ENSG00000174890/ENSMUSG00000034228 1 7 56928068 56935452 5 127935249  
127935413

B113 -1 7 65496178 70582019 5 128791601 132651725

B197 1 12 120431830 130562871 5 120717463 127828429  
ENSG00000174890/ENSMUSG00000034228 1 7 56928068 56935452 5 127935249  
127935413

B113 -1 7 65496178 70582019 5 128791601 132651725

(24) [ENSG00000164681/ENSMUSG00000034153](#):  
B112 1 7 43555304 54768752 11 5584810 16912546  
ENSG00000164681/ENSMUSG00000034153 1 7 64053641 64059786 5 128402635  
128407010

B113 -1 7 65496178 70582019 5 128791601 132651725

B197 1 12 120431830 130562871 5 120717463 127828429  
ENSG00000164681/ENSMUSG00000034153 1 7 64053641 64059786 5 128402635  
128407010

B113 -1 7 65496178 70582019 5 128791601 132651725



(25) [ENSG00000169910/ENSMUSG00000025533](#):  
B112 1 7 43555304 54768752 11 5584810 16912546  
ENSG00000169910/ENSMUSG00000025533 1 7 64180804 64197923 5 128435626  
128448675  
B113 -1 7 65496178 70582019 5 128791601 132651725  
  
B197 1 12 120431830 130562871 5 120717463 127828429  
ENSG00000169910/ENSMUSG00000025533 1 7 64180804 64197923 5 128435626  
128448675  
B113 -1 7 65496178 70582019 5 128791601 132651725

(26) [ENSG00000126522/ENSMUSG00000025532](#):  
B112 1 7 43555304 54768752 11 5584810 16912546  
ENSG00000126522/ENSMUSG00000025532 1 7 64219875 64257870 5 128453633  
128486847  
B113 -1 7 65496178 70582019 5 128791601 132651725  
  
B197 1 12 120431830 130562871 5 120717463 127828429  
ENSG00000126522/ENSMUSG00000025532 1 7 64219875 64257870 5 128453633  
128486847  
B113 -1 7 65496178 70582019 5 128791601 132651725

(27) [ENSG00000169902/ENSMUSG00000034118](#):  
B112 1 7 43555304 54768752 11 5584810 16912546  
ENSG00000169902/ENSMUSG00000034118 1 7 64310300 64465416 5 128505685  
128561797  
B113 -1 7 65496178 70582019 5 128791601 132651725  
  
B197 1 12 120431830 130562871 5 120717463 127828429  
ENSG00000169902/ENSMUSG00000034118 1 7 64310300 64465416 5 128505685  
128561797  
B113 -1 7 65496178 70582019 5 128791601 132651725

(28) [ENSG00000146684/ENSMUSG00000034110](#):  
B112 1 7 43555304 54768752 11 5584810 16912546  
ENSG00000146684/ENSMUSG00000034110 1 7 64733931 64745668 5 128571153  
128578676  
B113 -1 7 65496178 70582019 5 128791601 132651725  
  
B197 1 12 120431830 130562871 5 120717463 127828429  
ENSG00000146684/ENSMUSG00000034110 1 7 64733931 64745668 5 128571153  
128578676  
B113 -1 7 65496178 70582019 5 128791601 132651725

(29) [ENSG00000154710/ENSMUSG00000025340](#):  
B112 1 7 43555304 54768752 11 5584810 16912546  
ENSG00000154710/ENSMUSG00000025340 1 7 64845706 64916437 5 128613791  
128640948  
B113 -1 7 65496178 70582019 5 128791601 132651725  
  
B197 1 12 120431830 130562871 5 120717463 127828429  
ENSG00000154710/ENSMUSG00000025340 1 7 64845706 64916437 5 128613791  
128640948  
B113 -1 7 65496178 70582019 5 128791601 132651725

(30) [ENSG00000106609/ENSMUSG00000025338](#):  
B112 1 7 43555304 54768752 11 5584810 16912546  
ENSG00000106609/ENSMUSG00000025338 1 7 65026198 65061126 5 128649008  
128670085

B113 -1 7 65496178 70582019 5 128791601 132651725

B197 1 12 120431830 130562871 5 120717463 127828429  
ENSG00000106609/ENSMUSG00000025338 1 7 65026198 65061126 5 128649008  
128670085

B113 -1 7 65496178 70582019 5 128791601 132651725

(31) [ENSG00000146695/ENSMUSG00000034069](#):  
B112 1 7 43555304 54768752 11 5584810 16912546  
ENSG00000146695/ENSMUSG00000034069 1 7 65101811 65344486 5 128689644  
128767856

B113 -1 7 65496178 70582019 5 128791601 132651725

B197 1 12 120431830 130562871 5 120717463 127828429  
ENSG00000146695/ENSMUSG00000034069 1 7 65101811 65344486 5 128689644  
128767856

B113 -1 7 65496178 70582019 5 128791601 132651725

(32) [ENSG00000005486/ENSMUSG00000039917](#):  
B114 -1 7 71370997 73342666 5 132740372 133969586  
ENSG00000005486/ENSMUSG00000039917 1 7 74043817 74053790 5 134235636  
134246270

B115 -1 7 75349329 83808903 5 10906478 19817355

B114 -1 7 71370997 73342666 5 132740372 133969586  
ENSG00000005486/ENSMUSG00000039917 1 7 74043817 74053790 5 134235636  
134246270

B119 -1 7 98062835 100597327 5 134738623 137051964

(33) [ENSG00000127948/ENSMUSG00000005514](#):  
B114 -1 7 71370997 73342666 5 132740372 133969586  
ENSG00000127948/ENSMUSG00000005514 1 7 74118871 74151724 5 134292053  
134338221

B115 -1 7 75349329 83808903 5 10906478 19817355

B114 -1 7 71370997 73342666 5 132740372 133969586  
ENSG00000127948/ENSMUSG00000005514 1 7 74118871 74151724 5 134292053  
134338221

B119 -1 7 98062835 100597327 5 134738623 137051964

(34) [ENSG00000146701/ENSMUSG00000019179](#):  
B114 -1 7 71370997 73342666 5 132740372 133969586  
ENSG00000146701/ENSMUSG00000019179 1 7 74212944 74231482 5 134381527  
134393282

B115 -1 7 75349329 83808903 5 10906478 19817355

B114 -1 7 71370997 73342666 5 132740372 133969586  
ENSG00000146701/ENSMUSG00000019179 1 7 74212944 74231482 5 134381527  
134393282

B119 -1 7 98062835 100597327 5 134738623 137051964

(35) [ENSG00000106211/ENSMUSG00000004951](#):  
B114 -1 7 71370997 73342666 5 132740372 133969586  
ENSG00000106211/ENSMUSG00000004951 1 7 74467474 74469163 5 134490364  
134491947  
B115 -1 7 75349329 83808903 5 10906478 19817355  
  
B114 -1 7 71370997 73342666 5 132740372 133969586  
ENSG00000106211/ENSMUSG00000004951 1 7 74467474 74469163 5 134490364  
134491947  
B119 -1 7 98062835 100597327 5 134738623 137051964

(36) [ENSG00000091073/ENSMUSG00000004947](#):  
B114 -1 7 71370997 73342666 5 132740372 133969586  
ENSG00000091073/ENSMUSG00000004947 1 7 74626601 74670856 5 134600656  
134638938  
B115 -1 7 75349329 83808903 5 10906478 19817355  
  
B114 -1 7 71370997 73342666 5 132740372 133969586  
ENSG00000091073/ENSMUSG00000004947 1 7 74626601 74670856 5 134600656  
134638938  
B119 -1 7 98062835 100597327 5 134738623 137051964

(37) [ENSG00000091070/ENSMUSG00000004947](#):  
B114 -1 7 71370997 73342666 5 132740372 133969586  
ENSG00000091070/ENSMUSG00000004947 1 7 75124715 75216646 5 134600656  
134638938  
B115 -1 7 75349329 83808903 5 10906478 19817355  
  
B114 -1 7 71370997 73342666 5 132740372 133969586  
ENSG00000091070/ENSMUSG00000004947 1 7 75124715 75216646 5 134600656  
134638938  
B119 -1 7 98062835 100597327 5 134738623 137051964

(38) [ENSG00000156471/ENSMUSG00000021518](#):  
B142 -1 8 85653020 96246458 4 9258417 19488529  
ENSG00000156471/ENSMUSG00000021518 1 8 96283221 96355837 13 64424013  
64488784  
B143 1 8 96459282 143732083 15 32888006 77422816  
  
B152 1 9 88158123 90472665 13 61669473 63179589  
ENSG00000156471/ENSMUSG00000021518 1 8 96283221 96355837 13 64424013  
64488784  
B72 -1 5 232166 8088502 13 65619862 71445385

(39) [ENSG00000154529/ENSMUSG00000033063](#):  
B146 1 9 27637433 38782166 4 34605534 44701744  
ENSG00000154529/ENSMUSG00000033063 1 9 46391433 46526649 13 63578015  
63736165  
B147 -1 9 62064465 73833427 19 13594243 24464344  
  
B152 1 9 88158123 90472665 13 61669473 63179589  
ENSG00000154529/ENSMUSG00000033063 1 9 46391433 46526649 13 63578015  
63736165  
B72 -1 5 232166 8088502 13 65619862 71445385

(40) [ENSG00000174988/ENSMUSG00000033063](#):  
B146 1 9 27637433 38782166 4 34605534 44701744  
ENSG00000174988/ENSMUSG00000033063 1 9 46802978 46806999 13 63578015  
63736165  
B147 -1 9 62064465 73833427 19 13594243 24464344  
  
B152 1 9 88158123 90472665 13 61669473 63179589  
ENSG00000174988/ENSMUSG00000033063 1 9 46802978 46806999 13 63578015  
63736165  
B72 -1 5 232166 8088502 13 65619862 71445385

(41) [ENSG00000174985/ENSMUSG00000033063](#):  
B146 1 9 27637433 38782166 4 34605534 44701744  
ENSG00000174985/ENSMUSG00000033063 1 9 46821124 46833014 13 63578015  
63736165  
B147 -1 9 62064465 73833427 19 13594243 24464344  
  
B152 1 9 88158123 90472665 13 61669473 63179589  
ENSG00000174985/ENSMUSG00000033063 1 9 46821124 46833014 13 63578015  
63736165  
B72 -1 5 232166 8088502 13 65619862 71445385

(42) [ENSG00000106714/ENSMUSG00000033063](#):  
B146 1 9 27637433 38782166 4 34605534 44701744  
ENSG00000106714/ENSMUSG00000033063 1 9 47106016 47321708 13 63578015  
63736165  
B147 -1 9 62064465 73833427 19 13594243 24464344  
  
B152 1 9 88158123 90472665 13 61669473 63179589  
ENSG00000106714/ENSMUSG00000033063 1 9 47106016 47321708 13 63578015  
63736165  
B72 -1 5 232166 8088502 13 65619862 71445385

(43) [ENSG00000172092/ENSMUSG00000009248](#):  
B175 -1 11 371944 1812080 7 132256401 133113643  
ENSG00000172092/ENSMUSG00000009248 1 11 2271806 2272384 7 133400531  
133402933  
B176 1 11 4160230 18439115 7 91904633 106151720  
  
B175 -1 11 371944 1812080 7 132256401 133113643  
ENSG00000172092/ENSMUSG00000009248 1 11 2271806 2272384 7 133400531  
133402933  
B183 -1 11 71300640 73541758 7 134240159 135758348

(44) [ENSG00000064201/ENSMUSG00000000244](#):  
B175 -1 11 371944 1812080 7 132256401 133113643  
ENSG00000064201/ENSMUSG00000000244 1 11 2384830 2400920 7 133442143  
133456285  
B176 1 11 4160230 18439115 7 91904633 106151720  
  
B175 -1 11 371944 1812080 7 132256401 133113643  
ENSG00000064201/ENSMUSG00000000244 1 11 2384830 2400920 7 133442143  
133456285  
B183 -1 11 71300640 73541758 7 134240159 135758348

(45) [ENSG00000110651/ENSMUSG00000037706](#):  
B175 -1 11 371944 1812080 7 132256401 133113643  
ENSG00000110651/ENSMUSG00000037706 1 11 2460150 2480226 7 133489302  
133504176  
B176 1 11 4160230 18439115 7 91904633 106151720  
  
B175 -1 11 371944 1812080 7 132256401 133113643  
ENSG00000110651/ENSMUSG00000037706 1 11 2460150 2480226 7 133489302  
133504176  
B183 -1 11 71300640 73541758 7 134240159 135758348

(46) [ENSG00000172067/ENSMUSG00000037699](#):  
B175 -1 11 371944 1812080 7 132256401 133113643  
ENSG00000172067/ENSMUSG00000037699 1 11 2483604 2486702 7 133505605  
133507339  
B176 1 11 4160230 18439115 7 91904633 106151720  
  
B175 -1 11 371944 1812080 7 132256401 133113643  
ENSG00000172067/ENSMUSG00000037699 1 11 2483604 2486702 7 133505605  
133507339  
B183 -1 11 71300640 73541758 7 134240159 135758348

(47) [ENSG00000053918/ENSMUSG00000009545](#):  
B175 -1 11 371944 1812080 7 132256401 133113643  
ENSG00000053918/ENSMUSG00000009545 1 11 2527929 2929787 7 133544272  
133863920  
B176 1 11 4160230 18439115 7 91904633 106151720  
  
B175 -1 11 371944 1812080 7 132256401 133113643  
ENSG00000053918/ENSMUSG00000009545 1 11 2527929 2929787 7 133544272  
133863920  
B183 -1 11 71300640 73541758 7 134240159 135758348

(48) [ENSG00000110628/ENSMUSG00000000154](#):  
B175 -1 11 371944 1812080 7 132256401 133113643  
ENSG00000110628/ENSMUSG00000000154 1 11 2981554 3006932 7 133912581  
133940657  
B176 1 11 4160230 18439115 7 91904633 106151720  
  
B175 -1 11 371944 1812080 7 132256401 133113643  
ENSG00000110628/ENSMUSG00000000154 1 11 2981554 3006932 7 133912581  
133940657  
B183 -1 11 71300640 73541758 7 134240159 135758348

(49) [ENSG00000174615/ENSMUSG00000009545](#):  
B175 -1 11 371944 1812080 7 132256401 133113643  
ENSG00000174615/ENSMUSG00000009545 1 11 3257553 3266744 7 133544272  
133863920  
B176 1 11 4160230 18439115 7 91904633 106151720  
  
B175 -1 11 371944 1812080 7 132256401 133113643  
ENSG00000174615/ENSMUSG00000009545 1 11 3257553 3266744 7 133544272  
133863920  
B183 -1 11 71300640 73541758 7 134240159 135758348

(50) [ENSG00000102738/ENSMUSG00000031533](#):  
B201 -1 13 32474473 39232840 3 52717637 57680022  
ENSG00000102738/ENSMUSG00000031533 -1 13 39289770 39331639 8 21140858  
21158732  
B202 -1 13 39492467 47782086 14 63468306 70533960  
  
B126 1 8 297461 7385340 8 13927047 20676019  
ENSG00000102738/ENSMUSG00000031533 -1 13 39289770 39331639 8 21140858  
21158732  
B134 -1 8 37468035 41896742 8 21166936 24571771

(51) [ENSG00000102547/ENSMUSG00000021981](#):  
B202 -1 13 39492467 47782086 14 63468306 70533960  
ENSG00000102547/ENSMUSG00000021981 -1 13 47883903 47975458 14 50561762  
50650010  
B203 1 13 48224187 50354776 14 52423915 54060401  
  
B198 1 13 18187676 21343646 14 47784402 50243982  
ENSG00000102547/ENSMUSG00000021981 -1 13 47883903 47975458 14 50561762  
50650010  
B199 -1 13 21641475 22861222 14 51596223 52392288

(52) [ENSG00000136144/ENSMUSG00000021979](#):  
B202 -1 13 39492467 47782086 14 63468306 70533960  
ENSG00000136144/ENSMUSG00000021979 -1 13 48106045 48159652 14 50340896  
50361944  
B203 1 13 48224187 50354776 14 52423915 54060401  
  
B198 1 13 18187676 21343646 14 47784402 50243982  
ENSG00000136144/ENSMUSG00000021979 -1 13 48106045 48159652 14 50340896  
50361944  
B199 -1 13 21641475 22861222 14 51596223 52392288

(53) [ENSG00000136144/ENSMUSG00000035469](#):  
B202 -1 13 39492467 47782086 14 63468306 70533960  
ENSG00000136144/ENSMUSG00000035469 -1 13 48106045 48159652 14 50365796  
50374818  
B203 1 13 48224187 50354776 14 52423915 54060401  
  
B198 1 13 18187676 21343646 14 47784402 50243982  
ENSG00000136144/ENSMUSG00000035469 -1 13 48106045 48159652 14 50365796  
50374818  
B199 -1 13 21641475 22861222 14 51596223 52392288

(54) [ENSG00000123171/ENSMUSG00000017049](#):  
B203 1 13 48224187 50354776 14 52423915 54060401  
ENSG00000123171/ENSMUSG00000017049 1 13 50436105 50440331 8 20699120  
20703362  
B204 1 13 51194296 101505368 14 70539080 116001472  
  
B126 1 8 297461 7385340 8 13927047 20676019  
ENSG00000123171/ENSMUSG00000017049 1 13 50436105 50440331 8 20699120  
20703362  
B134 -1 8 37468035 41896742 8 21166936 24571771

(55) [ENSG00000136108/ENSMUSG00000037725](#):  
B203 1 13 48224187 50354776 14 52423915 54060401  
ENSG00000136108/ENSMUSG00000037725 1 13 50997127 51018192 8 20897324  
20914418  
B204 1 13 51194296 101505368 14 70539080 116001472  
  
B126 1 8 297461 7385340 8 13927047 20676019  
ENSG00000136108/ENSMUSG00000037725 1 13 50997127 51018192 8 20897324  
20914418  
B134 -1 8 37468035 41896742 8 21166936 24571771

(56) [ENSG00000173945/ENSMUSG00000031481](#):  
B203 1 13 48224187 50354776 14 52423915 54060401  
ENSG00000173945/ENSMUSG00000031481 1 13 51062641 51126274 8 21013955  
21100660  
B204 1 13 51194296 101505368 14 70539080 116001472  
  
B126 1 8 297461 7385340 8 13927047 20676019  
ENSG00000173945/ENSMUSG00000031481 1 13 51062641 51126274 8 21013955  
21100660  
B134 -1 8 37468035 41896742 8 21166936 24571771

(57) [ENSG00000174108/ENSMUSG00000032273](#):  
B214 1 15 30283818 46855367 2 114843098 128049851  
ENSG00000174108/ENSMUSG00000032273 -1 15 46907442 46907999 9 54545411  
54545956  
B215 -1 15 47519529 71896364 9 57376145 76368446  
  
B186 -1 11 109647080 137397151 9 25957960 54501406  
ENSG00000174108/ENSMUSG00000032273 -1 15 46907442 46907999 9 54545411  
54545956  
B216 1 15 71984258 74282355 9 55648761 57407518

(58) [ENSG00000137869/ENSMUSG00000032274](#):  
B214 1 15 30283818 46855367 2 114843098 128049851  
ENSG00000137869/ENSMUSG00000032274 -1 15 47059024 47173476 9 54684011  
54711904  
B215 -1 15 47519529 71896364 9 57376145 76368446  
  
B186 -1 11 109647080 137397151 9 25957960 54501406  
ENSG00000137869/ENSMUSG00000032274 -1 15 47059024 47173476 9 54684011  
54711904  
B216 1 15 71984258 74282355 9 55648761 57407518

(59) [ENSG00000104093/ENSMUSG00000041602](#):  
B214 1 15 30283818 46855367 2 114843098 128049851  
ENSG00000104093/ENSMUSG00000041602 -1 15 47298244 47472304 9 54892466  
54895134  
B215 -1 15 47519529 71896364 9 57376145 76368446  
  
B186 -1 11 109647080 137397151 9 25957960 54501406  
ENSG00000104093/ENSMUSG00000041602 -1 15 47298244 47472304 9 54892466  
54895134  
B216 1 15 71984258 74282355 9 55648761 57407518

(60) [ENSG00000104093/ENSMUSG00000041547](#):  
B214 1 15 30283818 46855367 2 114843098 128049851  
ENSG00000104093/ENSMUSG00000041547 -1 15 47298244 47472304 9 54901501  
54910683  
B215 -1 15 47519529 71896364 9 57376145 76368446

B186 -1 11 109647080 137397151 9 25957960 54501406  
ENSG00000104093/ENSMUSG00000041547 -1 15 47298244 47472304 9 54901501  
54910683  
B216 1 15 71984258 74282355 9 55648761 57407518

(61) [ENSG00000104093/ENSMUSG00000041363](#):  
B214 1 15 30283818 46855367 2 114843098 128049851  
ENSG00000104093/ENSMUSG00000041363 -1 15 47298244 47472304 9 54926950  
54933702  
B215 -1 15 47519529 71896364 9 57376145 76368446

B186 -1 11 109647080 137397151 9 25957960 54501406  
ENSG00000104093/ENSMUSG00000041363 -1 15 47298244 47472304 9 54926950  
54933702  
B216 1 15 71984258 74282355 9 55648761 57407518

(62) [ENSG00000104093/ENSMUSG00000041268](#):  
B214 1 15 30283818 46855367 2 114843098 128049851  
ENSG00000104093/ENSMUSG00000041268 -1 15 47298244 47472304 9 54953243  
54999454  
B215 -1 15 47519529 71896364 9 57376145 76368446

B186 -1 11 109647080 137397151 9 25957960 54501406  
ENSG00000104093/ENSMUSG00000041268 -1 15 47298244 47472304 9 54953243  
54999454  
B216 1 15 71984258 74282355 9 55648761 57407518

(63) [ENSG00000136376/ENSMUSG00000025722](#):  
B219 1 15 79014608 80632267 7 70854910 72326056  
ENSG00000136376/ENSMUSG00000025722 -1 15 81254705 81266080 7 70393316  
70403550  
B220 1 15 81971868 87927149 7 64852001 70357616

B220 1 15 81971868 87927149 7 64852001 70357616  
ENSG00000136376/ENSMUSG00000025722 -1 15 81254705 81266080 7 70393316  
70403550  
B219 1 15 79014608 80632267 7 70854910 72326056

(64) [ENSG00000174064/ENSMUSG00000025723](#):  
B219 1 15 79014608 80632267 7 70854910 72326056  
ENSG00000174064/ENSMUSG00000025723 -1 15 81266935 81269997 7 70404552  
70407352  
B220 1 15 81971868 87927149 7 64852001 70357616

B220 1 15 81971868 87927149 7 64852001 70357616  
ENSG00000174064/ENSMUSG00000025723 -1 15 81266935 81269997 7 70404552  
70407352  
B219 1 15 79014608 80632267 7 70854910 72326056



(65) [ENSG00000140612/ENSMUSG00000025724](#):  
B219 1 15 79014608 80632267 7 70854910 72326056  
ENSG00000140612/ENSMUSG00000025724 -1 15 81281350 81330710 7 70417696  
70449867  
B220 1 15 81971868 87927149 7 64852001 70357616  
  
B220 1 15 81971868 87927149 7 64852001 70357616  
ENSG00000140612/ENSMUSG00000025724 -1 15 81281350 81330710 7 70417696  
70449867  
B219 1 15 79014608 80632267 7 70854910 72326056

(66) [ENSG00000103226/ENSMUSG00000030835](#):  
B223 1 16 3315019 16052869 16 3157694 13950902  
ENSG00000103226/ENSMUSG00000030835 1 16 16153265 16234549 7 35610125  
35661336  
B224 1 16 16510398 30601232 7 106321383 118165833  
  
B256 -1 19 49444685 52717241 7 32900963 35524711  
ENSG00000103226/ENSMUSG00000030835 1 16 16153265 16234549 7 35610125  
35661336  
B177 1 11 18551546 27288357 7 35680929 45375815

(67) [ENSG00000167772/ENSMUSG00000002289](#):  
B250 1 19 7221494 8277183 8 3050238 4438387  
ENSG00000167772/ENSMUSG00000002289 1 19 8372432 8380884 17 32880122  
32887947  
B251 1 19 10042462 11820093 9 20698640 22209084  
  
B262 1 21 40038764 41625800 17 30171030 31278245  
ENSG00000167772/ENSMUSG00000002289 1 19 8372432 8380884 17 32880122  
32887947  
B90 -1 6 29575435 33309207 17 33016801 36305724

(68) [ENSG00000142392/ENSMUSG00000002290](#):  
B250 1 19 7221494 8277183 8 3050238 4438387  
ENSG00000142392/ENSMUSG00000002290 1 19 8396926 8410121 17 32852967  
32866669  
B251 1 19 10042462 11820093 9 20698640 22209084  
  
B262 1 21 40038764 41625800 17 30171030 31278245  
ENSG00000142392/ENSMUSG00000002290 1 19 8396926 8410121 17 32852967  
32866669  
B90 -1 6 29575435 33309207 17 33016801 36305724

(69) [ENSG00000170964/ENSMUSG00000024300](#):  
B250 1 19 7221494 8277183 8 3050238 4438387  
ENSG00000170964/ENSMUSG00000024300 -1 19 8624492 8632252 17 32658818  
32714130  
B251 1 19 10042462 11820093 9 20698640 22209084  
  
B262 1 21 40038764 41625800 17 30171030 31278245  
ENSG00000170964/ENSMUSG00000024300 -1 19 8624492 8632252 17 32658818  
32714130  
B90 -1 6 29575435 33309207 17 33016801 36305724

(70) [ENSG00000142303/ENSMUSG00000034344](#):  
B250 1 19 7221494 8277183 8 3050238 4438387  
ENSG00000142303/ENSMUSG00000034344 -1 19 8673495 8697960 17 32631534  
32641660  
B251 1 19 10042462 11820093 9 20698640 22209084  
  
B262 1 21 40038764 41625800 17 30171030 31278245  
ENSG00000142303/ENSMUSG00000034344 -1 19 8673495 8697960 17 32631534  
32641660  
B90 -1 6 29575435 33309207 17 33016801 36305724

(71) [ENSG00000142303/ENSMUSG00000034204](#):  
B250 1 19 7221494 8277183 8 3050238 4438387  
ENSG00000142303/ENSMUSG00000034204 -1 19 8673495 8697960 17 32641861  
32648307  
B251 1 19 10042462 11820093 9 20698640 22209084  
  
B262 1 21 40038764 41625800 17 30171030 31278245  
ENSG00000142303/ENSMUSG00000034204 -1 19 8673495 8697960 17 32641861  
32648307  
B90 -1 6 29575435 33309207 17 33016801 36305724

(72) [ENSG00000142303/ENSMUSG00000024299](#):  
B250 1 19 7221494 8277183 8 3050238 4438387  
ENSG00000142303/ENSMUSG00000024299 -1 19 8673495 8697960 17 32648615  
32656729  
B251 1 19 10042462 11820093 9 20698640 22209084  
  
B262 1 21 40038764 41625800 17 30171030 31278245  
ENSG00000142303/ENSMUSG00000024299 -1 19 8673495 8697960 17 32648615  
32656729  
B90 -1 6 29575435 33309207 17 33016801 36305724

(73) [ENSG00000099785/ENSMUSG00000002311](#):  
B250 1 19 7221494 8277183 8 3050238 4438387  
ENSG00000099785/ENSMUSG00000002311 1 19 8720174 8732580 17 32797706  
32824844  
B251 1 19 10042462 11820093 9 20698640 22209084  
  
B262 1 21 40038764 41625800 17 30171030 31278245  
ENSG00000099785/ENSMUSG00000002311 1 19 8720174 8732580 17 32797706  
32824844  
B90 -1 6 29575435 33309207 17 33016801 36305724

(74) [ENSG00000099783/ENSMUSG00000002291](#):  
B250 1 19 7221494 8277183 8 3050238 4438387  
ENSG00000099783/ENSMUSG00000002291 1 19 8738344 8782353 17 32752488  
32791582  
B251 1 19 10042462 11820093 9 20698640 22209084  
  
B262 1 21 40038764 41625800 17 30171030 31278245  
ENSG00000099783/ENSMUSG00000002291 1 19 8738344 8782353 17 32752488  
32791582  
B90 -1 6 29575435 33309207 17 33016801 36305724

(75) [ENSG00000133246/ENSMUSG00000032739](#):  
B250 1 19 7221494 8277183 8 3050238 4438387  
ENSG00000133246/ENSMUSG00000032739 -1 19 8783295 8795834 17 32746382  
32751705  
B251 1 19 10042462 11820093 9 20698640 22209084  
  
B262 1 21 40038764 41625800 17 30171030 31278245  
ENSG00000133246/ENSMUSG00000032739 -1 19 8783295 8795834 17 32746382  
32751705  
B90 -1 6 29575435 33309207 17 33016801 36305724

(76) [ENSG00000133250/ENSMUSG00000032825](#):  
B250 1 19 7221494 8277183 8 3050238 4438387  
ENSG00000133250/ENSMUSG00000032825 -1 19 8804577 8807400 17 32735601  
32737415  
B251 1 19 10042462 11820093 9 20698640 22209084  
  
B262 1 21 40038764 41625800 17 30171030 31278245  
ENSG00000133250/ENSMUSG00000032825 -1 19 8804577 8807400 17 32735601  
32737415  
B90 -1 6 29575435 33309207 17 33016801 36305724

(77) [ENSG00000142347/ENSMUSG00000024300](#):  
B250 1 19 7221494 8277183 8 3050238 4438387  
ENSG00000142347/ENSMUSG00000024300 -1 19 8814359 8849068 17 32658818  
32714130  
B251 1 19 10042462 11820093 9 20698640 22209084  
  
B262 1 21 40038764 41625800 17 30171030 31278245  
ENSG00000142347/ENSMUSG00000024300 -1 19 8814359 8849068 17 32658818  
32714130  
B90 -1 6 29575435 33309207 17 33016801 36305724

(78) [ENSG00000174700/ENSMUSG00000024300](#):  
B250 1 19 7221494 8277183 8 3050238 4438387  
ENSG00000174700/ENSMUSG00000024300 -1 19 8850807 8855419 17 32658818  
32714130  
B251 1 19 10042462 11820093 9 20698640 22209084  
  
B262 1 21 40038764 41625800 17 30171030 31278245  
ENSG00000174700/ENSMUSG00000024300 -1 19 8850807 8855419 17 32658818  
32714130  
B90 -1 6 29575435 33309207 17 33016801 36305724

(79) [ENSG00000130803/ENSMUSG00000024298](#):  
B250 1 19 7221494 8277183 8 3050238 4438387  
ENSG00000130803/ENSMUSG00000024298 1 19 9372697 9395516 17 32411238  
32499985  
B251 1 19 10042462 11820093 9 20698640 22209084  
  
B262 1 21 40038764 41625800 17 30171030 31278245  
ENSG00000130803/ENSMUSG00000024298 1 19 9372697 9395516 17 32411238  
32499985  
B90 -1 6 29575435 33309207 17 33016801 36305724

(80) [ENSG00000100191/ENSMUSG00000020226](#):

B268 -1 22 25864689 28696987 11 3002827 5412772

ENSG00000100191/ENSMUSG00000020226 -1 22 29310507 29347375 10 76493914  
76546472

B269 1 22 30362135 32596104 8 72342157 74778783

B266 -1 22 20049057 21700324 10 75608420 76436129

ENSG00000100191/ENSMUSG00000020226 -1 22 29310507 29347375 10 76493914  
76546472

B263 -1 21 41703939 44590131 10 76644938 78878387

(81) [ENSG00000100191/ENSMUSG00000020229](#):

B268 -1 22 25864689 28696987 11 3002827 5412772

ENSG00000100191/ENSMUSG00000020229 -1 22 29310507 29347375 10 76583965  
76625749

B269 1 22 30362135 32596104 8 72342157 74778783

B266 -1 22 20049057 21700324 10 75608420 76436129

ENSG00000100191/ENSMUSG00000020229 -1 22 29310507 29347375 10 76583965  
76625749

B263 -1 21 41703939 44590131 10 76644938 78878387
